# Supplementary material for: A genome-wide association meta-analysis on lipoprotein (a) concentrations adjusted for apolipoprotein (a) isoforms
Source: PubMed Central journal article supplement (PMC5580897; doi:10.1194/jlr.m076232), 2017-05-16
Supplement: 10.1194_M076232_jlr.M076232-1.pdf [file 10.1194_M076232_jlr.M076232-1.pdf]

## Supplementary Material to

### A genome-wide association meta-analysis on lipoprotein(a) concentrations adjusted for apolipoprotein(a) isoforms

Salome Mack<sup>1</sup>, Stefan Coassin<sup>1</sup>, Rico Rueedi<sup>2,3</sup>, Noha A. Yousri<sup>4,5</sup>, Ilkka Seppälä<sup>6</sup>, Christian Gieger<sup>7,8,9</sup>, Sebastian Schönherr<sup>1</sup>, Lukas Forer<sup>1</sup>, Gertraud Erhart<sup>1</sup>, Pedro Marques-Vidal<sup>10</sup>, Janina Ried<sup>7</sup>, Gerard Waeber<sup>10</sup>, Sven Bergmann<sup>2,3</sup>, Doreen Dähnhardt<sup>1</sup>, Andrea Stöckl<sup>1</sup>, Olli T Raitakari<sup>11,12</sup>, Mika Kähönen<sup>13</sup>, Annette Peters<sup>8,14,15</sup>, Thomas Meitinger<sup>16,17,18</sup>, Konstantin Strauch<sup>7,19</sup>, KORA-Study Group, Ludmilla Kedenko<sup>20</sup>, Bernhard Paulweber<sup>20</sup>, Terho Lehtimäki<sup>6</sup>, Steven C. Hunt<sup>21,22</sup>, Peter Vollenweider<sup>10</sup>, Claudia Lamina<sup>1,23,§,\*</sup>, Florian Kronenberg<sup>1,23,§,\*</sup>

<sup>1</sup> Division of Genetic Epidemiology, Department of Medical Genetics, Molecular and Clinical Pharmacology, Medical University of Innsbruck, 6020 Innsbruck, Austria

<sup>2</sup> Department of Computational Biology, University of Lausanne, 1015 Lausanne, Switzerland

<sup>3</sup> Swiss Institute of Bioinformatics, 1015 Lausanne, Switzerland

<sup>4</sup> Department of Physiology and Biophysics, Weill Cornell Medical College – Qatar, Doha, Qatar

<sup>5</sup> Department of Computer and Systems Engineering, Alexandria University, 21526 Alexandria, Egypt

<sup>6</sup> Department of Clinical Chemistry, Fimlab Laboratories and University of Tampere School of Medicine, 33520 Tampere, Finland

<sup>7</sup> Institute of Genetic Epidemiology, Helmholtz Zentrum München—German Research Center for Environmental Health, 85764 Neuherberg, Germany

<sup>8</sup> Institute of Epidemiology II, Helmholtz Zentrum München—German Research Center for Environmental Health, 85764 Neuherberg, Germany

<sup>9</sup> Research Unit of Molecular Epidemiology, Helmholtz Zentrum München—German Research Center for Environmental Health, 85764 Neuherberg, Germany

<sup>10</sup> Department of Medicine, Internal Medicine, Lausanne University Hospital, 1015 Lausanne, Switzerland

<sup>11</sup> Department of Clinical Physiology, Turku University Hospital, 20520 Turku, Finland

<sup>12</sup> Research Centre of Applied and Preventive Cardiovascular Medicine, University of Turku, 20520 Turku, Finland

<sup>13</sup> Department of Clinical Physiology, Tampere University Hospital and University of Tampere, 33521 Tampere, Finland

<sup>14</sup> DZHK (German Centre for Cardiovascular Research), partner site Munich Heart Alliance, 80802 Munich, Germany

<sup>15</sup> German Center for Diabetes Research (DZD e.V.), 85764 Neuherberg, Germany

<sup>16</sup> Institute of Human Genetics, Technische Universität München, 81675 München, Germany

<sup>17</sup> Institute of Human Genetics, Helmholtz Zentrum München, 85764 Neuherberg, Germany

<sup>18</sup> Munich Cluster for Systems Neurology (SyNergy), 81377 Munich, Germany

<sup>19</sup> Institute of Medical Informatics, Biometry and Epidemiology, Chair of Genetic Epidemiology, Ludwig-Maximilians-Universität, 81377 Munich, Germany

<sup>20</sup> First Department of Internal Medicine, Paracelsus Private Medical University, 5020 Salzburg, Austria

<sup>21</sup> Cardiovascular Genetics Division, University of Utah School of Medicine, Salt Lake City, UT 84108, USA

<sup>22</sup> Department of Genetic Medicine, Weill Cornell Medicine, Doha, Qatar

<sup>§</sup> **These authors contributed equally to this work**

**\*Address of correspondence:**

Florian Kronenberg  
Division of Genetic Epidemiology  
Department of Medical Genetics, Molecular and  
Clinical Pharmacology  
Medical University of Innsbruck  
Schöpfstr. 41, A-6020 Innsbruck, AUSTRIA  
Phone: (+43) 512 9003-70560  
Fax: (+43) 512 9003-73560 or -73561  
E-mail: Florian.Kronenberg@i-med.ac.at

Claudia Lamina  
Division of Genetic Epidemiology  
Department of Medical Genetics, Molecular  
and Clinical Pharmacology  
Medical University of Innsbruck  
Schöpfstr. 41, A-6020 Innsbruck, AUSTRIA  
Phone: (+43) 512 9003-70565  
Fax: (+43) 512 9003-73560 or -73561  
E-mail: Claudia.Lamina@i-med.ac.at

## Content

|                                                               |    |
|---------------------------------------------------------------|----|
| Supplementary Material and Methods .....                      | 4  |
| Study design and description of cohorts .....                 | 4  |
| Measurement of Lp(a) concentrations and apo(a) isoforms ..... | 5  |
| Statistical methods .....                                     | 5  |
| Quality control and filtering of SNPs .....                   | 5  |
| Meta-analysis .....                                           | 5  |
| Gene-based candidate gene analysis .....                      | 5  |
| Bioinformatic analysis .....                                  | 6  |
| Supplementary Tables .....                                    | 7  |
| Supplementary Figures.....                                    | 33 |
| Supplementary References .....                                | 39 |

## Supplementary Material and Methods

### Study design and description of cohorts

The **CoLaus study** is a single-center, prospective study which included 6,182 Caucasian subjects aged 35 to 75 years from the city of Lausanne in Switzerland (1). The major aims of the CoLaus study are the investigation of prevalence, and determinants of cardiovascular disease and cardiovascular risk factors in the Lausanne population. Full phenotype information as well as imputed genotypes are available for n=3,964 participants and over 7.6 M SNPs after filtering.

For the **NHLBI Family Heart Study (FamHS)**, 1,200 families (≈6,000 individuals) were ascertained in 1992, half randomly sampled, half selected because of an excess of coronary heart disease (CHD) or risk factor abnormalities (2). Study participants belonging to the largest pedigrees were invited for a second clinical exam (2002-04). GWA analysis was undertaken for 4,135 European participants leading to data including in total about 8.5 M SNPs after imputation and filtering. Both imputed genotype data as well as phenotype information is available for n=1,712 participants.

The **KORA F3** study, conducted in the years 2004/05, is a population-based sample from the general population living in the region of Augsburg, Southern Germany, which has evolved from the WHO MONICA study (Monitoring of Trends and Determinants of Cardiovascular Disease). Genome-wide data are available for all participants (n=3,076 with complete phenotype information) and about 9.7 M SNPs after imputation and filtering.

The **KORA F4** survey is an independent non-overlapping sample drawn from the same population in the years 2006/08. Genome-wide data are available for all participants in the KORA F4 study (n=2,926 with complete phenotype information) (3) and about 9.7 M SNPs after imputation and filtering. In KORA F4, two SNPs in the *APOE* gene (rs7412 and rs429358) were genotyped de novo in a multiplex approach using the SEQUENOM MassArray platform and iPLEX Gold chemistry.

The **Cardiovascular Risk in Young Finns Study (YFS)** is a prospective multicenter study from Finland initiated in 1980 (Baseline age 3–18 years) with several follow-ups over 30 years to investigate childhood risk factors for cardiometabolic outcomes (4). For 2,200 participants in the 2001 follow-up (ages 24-39 years), genome-wide data are available (5), leading to a total of more than 9 M imputed genotypes after filtering. Full phenotype information as well as imputed genotypes are available for n=2,103 participants.

The **SAPHIR** study (Salzburg Atherosclerosis Prevention Program in subjects at High Individual Risk) is an observational study conducted in the years 1999-2002 involving 1,770 unrelated subjects from a healthy working population. Study participants were recruited by health-screening programs in companies in and around the Austrian city of Salzburg (6). De-novo genotyping was performed for two SNPs in the *APOE* gene (rs7412 and rs429358) using the Agena MassARRAY4 system and iPlex

chemistry. Call rate was >99% for both. Full phenotype and genotype information for the two SNPs is available for n=1,422 participants.

### **Measurement of Lp(a) concentrations and apo(a) isoforms**

All measurements of Lp(a) concentrations as well as the apo(a) isoforms were performed in the same laboratory (Division of Genetic Epidemiology, Innsbruck, Austria) for all participating studies. Details on the measurement technique are given in (7). We applied a double-antibody enzyme-linked immunosorbent assay using an affinity-purified polyclonal apo(a) antibody for coating and the horseradish peroxidase-conjugated monoclonal 1A2 for detection. Apo(a) phenotyping was performed by sodium dodecyl sulfate-agarose gel electrophoresis (SDS agarose) under reducing conditions as described in (8). Electrophoresis was followed by immunoblotting using the monoclonal antibody 1A2 for detection of apo(a) isoforms.

### **Statistical methods**

#### Quality control and filtering of SNPs

Filtering of SNPs and quality control of the meta-analysis were performed centrally and standardized by the study group from Innsbruck using the program EasyQC (9). SNPs were only included in the analysis, when fulfilling the following criteria: imputation quality  $\geq 0.4$  (e.g. IMPUTE info), minor allele frequency  $\geq 0.5\%$  and a p-value of the HWE-test  $\geq 1e-06$ . Additional analyses for quality control were applied on the already filtered result datasets, which included the P-Z-plot (9) and calculation of genomic inflation factor  $\lambda$ . The P-Z-plot compares the reported p-values from each study with the p-values calculated from Z-statistics derived from the reported beta coefficient and standard error.

#### Meta-analysis

For the meta-analysis of all GWA studies, the software METASOFT (10) was used for all imputed SNPs that met imputation and quality control criteria. SNPs were only included in the meta-analysis if they were available in two or more studies. Per default, the fixed effects inverse variance-weighted method was applied to all SNPs. In addition, the optimized random effects model (RE) as proposed by Han & Eskin (10) was additionally used for heterogeneous SNPs ( $I^2 \geq 50$ ). In each model, the test statistics were corrected for genomic inflation in both the GWA analysis stage and meta-analysis stage.

#### Gene-based candidate gene analysis

The 21 candidate genes that were tested for association are the reported *LPA* receptors and possible *LPA* regulators *LDLR* (11), *CD36* (12, 13), *LGALS1* (14), *LRP1* (aka *APOER*/apoE receptor) (15), *LRP2*

(aka megalin/gp330) (16), *LRP8* (aka *APOER2*; a member of the LDLR family targeted by *PCSK9*) (17), *SCARB1* (18), *VLDLR* (19), *FBLN5* (20), *IL6* (21), *NR1H4* (aka *FXR*) (22), *FGF19* (23), *FGFR4* (23), *TLR2* (12), *TLR4* (13), *TLR6* (12, 24), the plasminogen receptor *ANXA2* (which has been implicated as potential Lp(a) receptor and in turn inhibits *PCSK9*) (25), as well as *PCSK9* (26) and components of its regulatory machinery (*SREBF1*, *SREBF2*, *HNF1A* (27)).

## Bioinformatic analysis

By using the proxy search option of SNIIPA(17), we retrieved all SNPs in LD with our hits reported in Supplementary Table S4 (1000g ph3v5 data with lower  $r^2$  limit = 0.8; 499 unique SNPs). This SNP list was annotated using the UCSC Table Browser(28) (hg38.snp147CodingDbSnp table in the “All SNPs (147)” data track) to retrieve all SNPs located in protein-coding regions. The dbSNP functional category was reported by the Table Browser was followed for assignment to a canonical splice site. Only annotations referring to valid RefSeq Transcripts (NM-IDs) were considered. For *PLG* only transcript variant 1 (NM\_000301) was considered as it is the larger transcript and transcript variant 2 (NM\_001168338) shares the same coding region, but is truncated. Any annotations referring to predicted transcripts (XM-IDs) were discarded. Polyphen and SIFT predictions on missense variants were retrieved using the VEP tool(29).

The same SNP set was annotated also with ENCODE(30) and ORegAnno(31) data. The SNP list was used as input for UCSC Table browser (data track “All SNPs (147)”) and intersected with the wgEncodeRegTfbsClusteredV3 table in the data track “Txn Factor CHIP” and with the “ORegAnno data track”. Any positive intersections were reviewed manually in the UCSC Genome Browser and documented in Supplementary Table 10.

GTEx(32) was searched for reported eQTL SNPs for *LPA* (i.e. SNP being correlated with *LPA* expression).

## Supplementary Tables

**Table S1:** Baseline characteristics of contributing studies.

|                              | CoLaus<br>(n=3,964)         | FamHS<br>(n=1,712)               | KORA F3<br>(n=3,076)             | KORA F4<br>(n=2,926)             | YFS<br>(n=2,103)                      | SAPHIR<br>(n=1,454)              |
|------------------------------|-----------------------------|----------------------------------|----------------------------------|----------------------------------|---------------------------------------|----------------------------------|
| Age (in years)               | 58.5 ± 10.5<br>[50, 58, 67] | 51.2 ± 13.9<br>[39, 52, 63]      | 57.3 ± 12.9<br>[46, 57, 67]      | 56.2 ± 13.3<br>[44, 56, 67]      | 31.7 ± 5.0<br>[27, 33, 36]            | 51 ± 6.0<br>[46, 52, 55]         |
| Women, n (%)                 | 2124 (53.6%)                | 927 (54.1%)                      | 1577 (51.27%)                    | 1509 (51.6%)                     | 1155 (54.9%)                          | 472 (32.5%)                      |
| Lp(a)<br>(mg/dL)             | 24 ± 27<br>[5, 12, 32]      | 21.0 ± 24.0<br>[4.2, 10.2, 32.5] | 21.9 ± 26.0<br>[4.9, 11.1, 28.4] | 21.8 ± 24.6<br>[5.2, 11.7, 30.6] | 12.5 ± 15.5<br>[2.8, 6.3, 15.1]       | 24.1 ± 27.5<br>[5.4, 11.8, 36.8] |
| LDL cholesterol<br>(mg/dL)   | 133 ± 36<br>[108, 131, 158] | 124.3 ± 33.8<br>[100, 123, 145]  | 128.0 ± 32.6<br>[105, 126, 148]  | 136.1 ± 34.9<br>[111, 134, 158]  | 126.2 ± 32.4<br>[104.4, 123.7, 147.0] | 145.1 ± 35.6<br>[120, 144, 168]  |
| HDL cholesterol<br>(mg/dL)   | 64 ± 18<br>[50, 62, 73]     | 49.6 ± 14.7<br>[39, 47, 58]      | 58.8 ± 17.1<br>[47, 56, 69]      | 55.9 ± 14.4<br>[45, 54, 65]      | 49.8 ± 12.2<br>[41.0, 49.1, 57.6]     | 59.2 ± 15.6<br>[48, 57, 68]      |
| Total cholesterol<br>(mg/dL) | 220 ± 40<br>[193, 220, 247] | 203.6 ± 38.7<br>[177, 202, 228]  | 218.3 ± 39.9<br>[191, 216, 243]  | 216.1 ± 39.7<br>[188, 214, 240]  | 199.0 ± 37.7<br>[96.7, 197.2, 220.4]  | 226.7 ± 38.8<br>[200, 225, 251]  |
| Triglycerides (mg/dL)        | 120 ± 78<br>[71, 97, 142]   | 148.8 ± 102.7<br>[84, 124, 186]  | 164.7 ± 125.8<br>[88, 135, 200]  | 125 ± 89.2<br>[72, 105, 151]     | 118.4 ± 75.7<br>[70.9, 97.4, 141.7]   | 126.4 ± 90<br>[72, 101, 151]     |

Continuous variables are shown as mean +/- stdev and [25%,50%,75%]-Percentiles

n: Sample size of analysis dataset with available Lp(a)-values and genotypes

**Table S2:** Genotyping and imputation information of contributing studies at the discovery stage.

|                                    | CoLaus                                         | FamHS                                                                  | KORA F3                                        | KORA F4                                        | YFS                                                    |
|------------------------------------|------------------------------------------------|------------------------------------------------------------------------|------------------------------------------------|------------------------------------------------|--------------------------------------------------------|
| SNP-chip                           | Affymetrix GeneChip® Human Mapping 500K        | Illumina Human 1M-Duo v3 / Illumina 610-Quadv1/ Illumina Human Hap550K | Illumina Omni 2.5/ Illumina Omni Express       | Affymetrix Axiom                               | Illumina 670k                                          |
| QC before imputation               | callrate >90%*, p-value HWE > 10 <sup>-7</sup> | callrate >98%, p-value HWE > 10 <sup>-6</sup> , MAF>1%                 | callrate >98%, p-value HWE > 10 <sup>-10</sup> | callrate >98%, p-value HWE > 10 <sup>-10</sup> | callrate >95%, p-value HWE > 10 <sup>-6</sup> , MAF>1% |
| Program used for Imputation        | minimac                                        | MACH                                                                   | IMPUTE                                         | IMPUTE                                         | IMPUTE                                                 |
| Reference panel for imputation     | 1000G phase1v3                                 | 1000G phase1v3                                                         | 1000G phase1v3                                 | 1000G phase1v3                                 | 1000G phase1v3                                         |
| Program used for GWA analysis      | In-house Matlab code                           | PROBABEL                                                               | SNPTest                                        | SNPTest                                        | SNPTest 2.4.1                                          |
| Genomic inflation factor $\lambda$ | 1.011                                          | 1.030                                                                  | 1.021                                          | 1.015                                          | 1.011                                                  |

\*median call-rate for all SNPs used for imputation: 0.9957



**Table S3:** Definition and frequency of *APOE* genotypes.

| rs7412 | rs429358 | <i>APOE</i> *  | n (%) KORA F3 | n (%) KORA F4 | n (%) SAPHIR  |
|--------|----------|----------------|---------------|---------------|---------------|
| TT     | TT       | <i>E2/E2</i>   | 17 (0.55)     | 20 (0.70)     | 8 (0.47)      |
| TT     | TC       | does not occur |               |               |               |
| TT     | CC       | does not occur |               |               |               |
| CT     | TT       | <i>E2/E3</i>   | 402 (13.06)   | 392 (13.74)   | 215 (12.72)   |
| CT     | TC       | <i>E2/E4</i>   | 77 (2.50)     | 47 (1.65)     | 45 (2.66)     |
| CT     | CC       | does not occur |               |               |               |
| CC     | TT       | <i>E3/E3</i>   | 1,884 (61.23) | 1,745 (61.19) | 1,062 (62.84) |
| CC     | TC       | <i>E3/E4</i>   | 640 (20.80)   | 589 (20.65)   | 338 (20.00)   |
| CC     | CC       | <i>E4/E4</i>   | 57 (1.85)     | 59 (2.07)     | 22 (1.30)     |

\*according to (33, 34)

**Table S4:** Characteristics of the independent SNPs based on the conditional analysis for the inverse-normal transformed Lp(a) values adjusted for age and sex (model 1) as well as on the inverse-normal transformed Lp(a) values adjusted on age, sex and the predominantly expressed apo(a) isoform (model 2). The table is sorted by gene region and rsID. Column 8 reports coding SNPs in linkage disequilibrium ( $r^2=0.8$ ) with the marker SNP. Missense SNPs are written in bold. When the marker SNP is coding itself, the complete marker line is written in bold and the column reports only the amino acid exchange. The columns 9-11 report the number of correlated SNPs (including the lead SNP) which are located in any of the defined functional elements, based on UCSC Genome Browser data on hg19. Column 9 and 10 report transcription factor binding sites (TFBS) detected by CHIP(35–37) and DNase hypersensitive sites found by the ENCODE project(30). The ORegAnno(31) (column 10) is a curated database about regulatory regions. TFBS: transcription factor binding sites according to CHIP-Seq experiments. Details are reported in Table S9.

| SNP                    | chr:position | nearest gene | Minor / ref allele | MAF range of contributing studies | MAF 1000G ph1v3 | Independently associated in model |   | Correlated non-synonymous SNPs ( $r^2>0.8$ ) | Number of correlated SNPs ( $r^2>0.8$ ), which overlap with |               |                                     |
|------------------------|--------------|--------------|--------------------|-----------------------------------|-----------------|-----------------------------------|---|----------------------------------------------|-------------------------------------------------------------|---------------|-------------------------------------|
|                        |              |              |                    |                                   |                 | 1                                 | 2 |                                              | ENCODE TFBS ChIP Signal                                     | ORegAnno Site | ENCODE DNase hypersensitive cluster |
| <b>LPA gene region</b> |              |              |                    |                                   |                 |                                   |   |                                              |                                                             |               |                                     |
| rs1018234              | 6:160796058  | SLC22A3      | T/C                | 0.288-0.318                       | 0.286           | ✓                                 |   |                                              | 3                                                           |               | 5                                   |
| rs112842440            | 6:160955713  | LPA          | T/G                | 0.014-0.018                       | 0.016           |                                   | ✓ |                                              | 1                                                           | 1             |                                     |
| rs116850263            | 6:161029670  | LPA          | C/T                | 0.007-0.038                       | 0.009           | ✓                                 |   |                                              |                                                             |               |                                     |
| rs117026595            | 6:161068235  | LPA          | T/A                | 0.013-0.015                       | 0.024           |                                   | ✓ |                                              |                                                             |               |                                     |
| rs117162385            | 6:161078184  | LPA          | A/G                | 0.005-0.024                       | 0.007           | ✓                                 |   |                                              |                                                             |               |                                     |
| rs118039278            | 6:160985526  | LPA          | A/G                | 0.032-0.079                       | 0.074           | ✓                                 |   |                                              |                                                             |               |                                     |
| rs12204009             | 6:160799246  | SLC22A3      | C/T                | 0.005-0.008                       | 0.009           | ✓                                 |   |                                              | 1                                                           |               |                                     |
| rs12207325             | 6:160903911  | SLC22A3      | A/G                | 0.007-0.013                       | 0.005           |                                   | ✓ |                                              |                                                             |               |                                     |
| rs12529361             | 6:161125631  | PLG          | C/T                | 0.169-0.223                       | 0.217           | ✓                                 |   |                                              | 1                                                           |               |                                     |
| rs12664092             | 6:160948136  | LPA          | C/A                | 0.029-0.036                       | 0.028           | ✓                                 | ✓ |                                              |                                                             |               |                                     |
| rs139699952            | 6:161221380  | PLG          | C/G                | 0.025-0.030                       | 0.046           | ✓                                 |   |                                              | 1                                                           |               |                                     |
| rs140570886            | 6:161013013  | LPA          | C/T                | 0.011-0.023                       | 0.011           |                                   | ✓ | rs3798220 (LPA Iso1891Met)                   | 1                                                           | 1             | 2                                   |
| rs141463285            | 6:160838646  | SLC22A3      | A/T                | 0.005-0.007                       | 0.007           | ✓                                 | ✓ |                                              | 1                                                           |               |                                     |
| rs141550222            | 6:160992001  | LPA          | G/C                | 0.023-0.062                       | 0.040           | ✓                                 |   |                                              |                                                             |               |                                     |
| rs142126734            | 6:160942926  | LPA          | A/G                | 0.035-0.054                       | 0.042           | ✓                                 | ✓ |                                              |                                                             |               |                                     |
| rs143520616            | 6:160631170  | SLC22A2      | T/G                | 0.009-0.026                       | 0.032           | ✓                                 |   |                                              |                                                             |               |                                     |
| rs143665477            | 6:160867272  | SLC22A3      | C/T                | 0.007-0.013                       | 0.008           | ✓                                 |   |                                              |                                                             |               |                                     |
| rs145470851            | 6:161004351  | LPA          | A/G                | 0.006-0.014                       | 0.009           |                                   | ✓ |                                              |                                                             |               |                                     |

... to be continued

Table S4: continued

| SNP         | chr:position | nearest gene | Minor / ref allele | MAF range of contributing studies | MAF 1000G ph1v3 | Independently associated in model |   | Correlated non-synonymous SNPs ( $r^2 > 0.8$ )                                                           | Number of correlated SNPs ( $r^2 > 0.8$ ), which overlap with |                |                                     |
|-------------|--------------|--------------|--------------------|-----------------------------------|-----------------|-----------------------------------|---|----------------------------------------------------------------------------------------------------------|---------------------------------------------------------------|----------------|-------------------------------------|
|             |              |              |                    |                                   |                 | 1                                 | 2 |                                                                                                          | ENCODE TFBS ChIP Signal                                       | ORegAn no Site | ENCODE DNase hypersensitive cluster |
| rs147010904 | 6:160625299  | SLC22A2      | T/C                | 0.006-0.010                       | 0.004           |                                   | ✓ |                                                                                                          |                                                               |                |                                     |
| rs147402310 | 6:161163530  | PLG          | G/T                | 0.019-0.043                       | 0.012           | ✓                                 |   |                                                                                                          | 1                                                             |                |                                     |
| rs147555597 | 6:160911596  | SLC22A3      | A/G                | 0.006-0.007                       | 0.007           |                                   | ✓ |                                                                                                          |                                                               |                |                                     |
| rs149302195 | 6:160803694  | SLC22A3      | T/C                | 0.006-0.018                       | 0.005           |                                   | ✓ |                                                                                                          |                                                               |                |                                     |
| rs150571318 | 6:161702138  | AGPAT4       | A/G                | 0.006-0.026                       | 0.005           | ✓                                 |   |                                                                                                          | 1                                                             |                |                                     |
| rs1510224   | 6:160894878  | SLC22A3      | C/T                | 0.013-0.021                       | 0.009           | ✓                                 |   | rs3798220 ( <i>LPA</i> Iso1891Met)                                                                       | 1                                                             | 1              | 1                                   |
| rs151181359 | 6:160934525  | LPA          | C/A                | 0.010-0.011                       | 0.005           | ✓                                 |   | rs41264848 ( <i>LPA</i> Asp1719Asp)                                                                      | 15                                                            | 3              |                                     |
| rs182532458 | 6:160453352  | IGF2R        | A/G                | 0.005-0.025                       | 0.006           | ✓                                 | ✓ |                                                                                                          | 2                                                             | 1              |                                     |
| rs184278183 | 6:161177756  | PLG          | T/C                | 0.005-0.010                       | 0.003           | ✓                                 |   |                                                                                                          |                                                               |                |                                     |
| rs185934663 | 6:161067929  | LPA          | G/T                | 0.005-0.018                       | 0.009           | ✓                                 |   |                                                                                                          |                                                               |                |                                     |
| rs186696265 | 6:161111700  | PLG          | T/C                | 0.009-0.017                       | 0.011           | ✓                                 | ✓ |                                                                                                          |                                                               |                |                                     |
| rs187270959 | 6:160340256  | MAS1         | C/A                | 0.005-0.011                       | 0.005           | ✓                                 |   |                                                                                                          |                                                               |                |                                     |
| rs188974863 | 6:161074983  | LPA          | A/T                | 0.082-0.102                       | 0.093           |                                   | ✓ |                                                                                                          |                                                               |                |                                     |
| rs2140650   | 6:161508438  | MAP3K4       | G/A                | 0.230-0.255                       | 0.217           | ✓                                 |   |                                                                                                          |                                                               |                |                                     |
| rs2246531   | 6:160838648  | SLC22A3      | G/A                | 0.193-0.242                       | 0.229           | ✓                                 |   |                                                                                                          | 3                                                             |                |                                     |
| rs2457557   | 6:160785507  | SLC22A3      | T/C                | 0.207-0.251                       | 0.230           | ✓                                 |   |                                                                                                          | 4                                                             |                |                                     |
| rs2457574   | 6:160868701  | SLC22A3      | A/G                | 0.427-0.531                       | 0.435           | ✓                                 |   |                                                                                                          |                                                               |                |                                     |
| rs2489940   | 6:161283929  | PLG          | T/G                | 0.010-0.032                       | 0.011           | ✓                                 |   |                                                                                                          |                                                               |                |                                     |
| rs3798221   | 6:160998148  | LPA          | T/G                | 0.189-0.240                       | 0.212           |                                   | ✓ |                                                                                                          | 1                                                             |                |                                     |
| rs41259144  | 6:161022107  | LPA          | T/C                | 0.006-0.012                       | 0.013           | ✓                                 |   | <i>LPA</i> Arg990Gln                                                                                     |                                                               |                |                                     |
| rs41267807  | 6:160952816  | LPA          | C/T                | 0.015-0.023                       | 0.017           |                                   | ✓ | <i>LPA</i> Tyr2023Cys                                                                                    |                                                               |                |                                     |
| rs41267809  | 6:160953642  | LPA          | G/A                | 0.006-0.024                       | 0.021           |                                   | ✓ | <i>LPA</i> Leu1961Pro                                                                                    |                                                               |                |                                     |
| rs41269133  | 6:161087863  | LPA          | C/T                | 0.079-0.156                       | 0.115           | ✓                                 |   |                                                                                                          |                                                               |                |                                     |
| rs41272114  | 6:161006077  | LPA          | T/C                | 0.023-0.048                       | 0.028           | ✓                                 | ✓ | <i>LPA</i> K-IV-8 5' splice site                                                                         |                                                               |                |                                     |
| rs4252109   | 6:161137663  | PLG          | G/T                | 0.257-0.320                       | 0.276           | ✓                                 |   | rs4757 ( <i>PLG</i> Asn110Asn),<br>rs13231 ( <i>PLG</i> Gln361Gln),<br>rs4252125 ( <i>PLG</i> Asp472Asn) | 9                                                             | 2              |                                     |
| rs4252185   | 6:161123451  | PLG          | C/T                | 0.052-0.078                       | 0.073           | ✓                                 |   |                                                                                                          |                                                               |                |                                     |
| rs4252198   | 6:161173728  | PLG          | G/C                | 0.014-0.022                       | 0.024           | ✓                                 | ✓ |                                                                                                          |                                                               |                |                                     |

... to be continued

Table S4: continued

| SNP                     | chr:position | nearest gene | Minor / ref allele | MAF range of contributing studies | MAF 1000G ph1v3 | Independently associated in model |   | Correlated non-synonymous SNPs ( $r^2 > 0.8$ )                                                           | Number of correlated SNPs ( $r^2 > 0.8$ ), which overlap with |                |                                     |
|-------------------------|--------------|--------------|--------------------|-----------------------------------|-----------------|-----------------------------------|---|----------------------------------------------------------------------------------------------------------|---------------------------------------------------------------|----------------|-------------------------------------|
|                         |              |              |                    |                                   |                 | 1                                 | 2 |                                                                                                          | ENCODE TFBS ChIP Signal                                       | ORegAn no Site | ENCODE DNase hypersensitive cluster |
| rs520829                | 6:160767905  | SLC22A3      | G/T                | 0.490-0.511                       | 0.481           | ✓                                 |   | rs668871 ( <i>SLC22A3</i> Arg120Arg)                                                                     | 14                                                            | 7              |                                     |
| rs55730499              | 6:161005610  | LPA          | T/C                | 0.032-0.078                       | 0.070           |                                   | ✓ |                                                                                                          |                                                               |                |                                     |
| rs56393506              | 6:161089307  | LPA          | T/C                | 0.152-0.172                       | 0.171           | ✓                                 | ✓ |                                                                                                          | 1                                                             |                |                                     |
| rs59614420              | 6:161129013  | PLG          | A/G                | 0.252-0.331                       | 0.279           |                                   | ✓ | rs4757 ( <i>PLG</i> Asn110Asn),<br>rs13231 ( <i>PLG</i> Gln361Gln),<br>rs4252125 ( <i>PLG</i> Asp472Asn) | 9                                                             | 2              |                                     |
| rs614754                | 6:160505199  | IGF2R        | C/G                | 0.007-0.018                       | 0.016           | ✓                                 |   | <i>IGF2R</i> Leu2017Leu                                                                                  |                                                               |                |                                     |
| rs62440901              | 6:160569068  | SLC22A1      | T/C                | 0.123-0.162                       | 0.148           | ✓                                 | ✓ |                                                                                                          |                                                               |                |                                     |
| rs62441903              | 6:160987060  | LPA          | G/A                | 0.005-0.017                       | 0.017           | ✓                                 |   |                                                                                                          |                                                               |                |                                     |
| rs6902316               | 6:160893167  | SLC22A3      | G/A                | 0.009-0.015                       | 0.002           | ✓                                 |   | rs41264848 ( <i>LPA</i> Asp1719Asp)                                                                      | 13                                                            | 3              |                                     |
| rs6903649               | 6:160991798  | LPA          | C/T                | 0.247-0.342                       | 0.284           | ✓                                 |   |                                                                                                          |                                                               |                |                                     |
| rs6938647               | 6:160986915  | LPA          | A/C                | 0.201-0.268                       | 0.219           | ✓                                 | ✓ |                                                                                                          |                                                               |                |                                     |
| rs73596816              | 6:161017363  | LPA          | A/G                | 0.011-0.026                       | 0.021           | ✓                                 |   |                                                                                                          |                                                               |                |                                     |
| rs75234242              | 6:161018985  | LPA          | A/G                | 0.031-0.038                       | 0.037           |                                   | ✓ |                                                                                                          | 1                                                             |                |                                     |
| rs75692336              | 6:161030231  | LPA          | A/C                | 0.100-0.133                       | 0.142           |                                   | ✓ | rs41272110(38, 39) ( <i>LPA</i> Thr1399Pro)                                                              | 1                                                             |                |                                     |
| rs76000021              | 6:160985501  | LPA          | C/T                | 0.014-0.023                       | 0.016           | ✓                                 |   |                                                                                                          |                                                               |                |                                     |
| rs7769879               | 6:160865645  | SLC22A3      | C/G                | 0.323-0.370                       | 0.358           |                                   | ✓ | rs2292334 ( <i>SLC22A3</i> Ala411Ala)                                                                    | 2                                                             |                |                                     |
| rs7770628               | 6:161018174  | LPA          | C/T                | 0.424-0.498                       | 0.465           | ✓                                 |   |                                                                                                          |                                                               |                |                                     |
| rs78439586              | 6:160820922  | SLC22A3      | A/G                | 0.059-0.077                       | 0.063           | ✓                                 | ✓ |                                                                                                          |                                                               |                |                                     |
| rs79246098              | 6:161078894  | LPA          | C/T                | 0.005-0.011                       | 0.011           | ✓                                 |   |                                                                                                          |                                                               |                |                                     |
| rs9295143               | 6:161654115  | AGPAT4       | G/C                | 0.053-0.074                       | 0.047           |                                   | ✓ |                                                                                                          |                                                               |                |                                     |
| rs9365169               | 6:160966347  | LPA          | G/C                | 0.495-0.536                       | 0.488           |                                   | ✓ |                                                                                                          |                                                               |                |                                     |
| rs9457778               | 6:160353291  | MAS1         | T/C                | 0.186-0.336                       | 0.219           | ✓                                 |   |                                                                                                          | 12                                                            | 1              |                                     |
| rs9458010               | 6:161125419  | PLG          | C/T                | 0.432-0.466                       | 0.443           | ✓                                 |   |                                                                                                          | 1                                                             |                |                                     |
| <b>APOE gene region</b> |              |              |                    |                                   |                 |                                   |   |                                                                                                          |                                                               |                |                                     |
| rs7412                  | 19:45412079  | APOE         | T/C                | 0.050-0.091                       | 0.066           | ✓                                 | ✓ |                                                                                                          |                                                               |                |                                     |

**Table S5:** GWAS-results of the five cohorts on inverse-normal transformed Lp(a) values, adjusted on age and sex. The beta effect and effect direction refer to the minor allele. The Table is sorted according to the p-value of the meta-analysis results (as in Table S6).

| SNP                    | Min_allele/<br>Ref_allele | Effect<br>Direction* | Colaus study  |          | FamHS study   |          | KORAF3 study  |          | KORAF4 study  |           | YFS study     |          |
|------------------------|---------------------------|----------------------|---------------|----------|---------------|----------|---------------|----------|---------------|-----------|---------------|----------|
|                        |                           |                      | $\beta$ (se)  | p-value  | $\beta$ (se)  | p-value  | $\beta$ (se)  | p-value  | $\beta$ (se)  | p-value   | $\beta$ (se)  | p-value  |
| <b>LPA gene region</b> |                           |                      |               |          |               |          |               |          |               |           |               |          |
| rs118039278            | A/G                       | ++++                 | 1.21 (0.059)  | 1.68E-94 | 1 (0.071)     | 1.59E-45 | 1.22 (0.059)  | 3.02E-89 | 1.27 (0.053)  | 3.95E-118 | 1.44 (0.091)  | 1.35E-53 |
| rs56393506             | T/C                       | ++++                 | 0.75 (0.039)  | 1.13E-80 | 0.7 (0.055)   | 2.92E-36 | 0.72 (0.037)  | 2.49E-78 | 0.76 (0.037)  | 2.19E-88  | 0.39 (0.044)  | 1.79E-18 |
| rs186696265            | T/C                       | ++++                 | 2.61 (0.139)  | 4.26E-78 | 1.59 (0.142)  | 3.63E-29 | 1.97 (0.125)  | 1.08E-53 | 1.81 (0.125)  | 7.88E-46  | 2.18 (0.16)   | 1.30E-40 |
| rs4252185              | C/T                       | ++++                 | 1.18 (0.07)   | 1.30E-63 | 0.82 (0.077)  | 1.39E-26 | 0.85 (0.06)   | 1.20E-44 | 0.9 (0.053)   | 2.92E-62  | 0.83 (0.076)  | 4.37E-27 |
| rs1510224              | C/T                       | ++++                 | 1.58 (0.095)  | 5.58E-62 | 1.26 (0.124)  | 3.30E-24 | 1.08 (0.1)    | 8.41E-27 | 1.37 (0.109)  | 5.93E-35  | 1.47 (0.138)  | 1.23E-25 |
| rs6938647              | A/C                       | ----                 | -0.39 (0.029) | 1.03E-41 | -0.33 (0.047) | 2.33E-12 | -0.28 (0.032) | 1.52E-18 | -0.41 (0.033) | 4.49E-34  | -0.41 (0.041) | 2.06E-23 |
| rs4252109              | G/T                       | ----                 | -0.3 (0.024)  | 4.60E-37 | -0.31 (0.037) | 1.25E-16 | -0.28 (0.027) | 1.86E-23 | -0.27 (0.028) | 2.61E-21  | -0.28 (0.034) | 2.62E-16 |
| rs41272114             | T/C                       | ----                 | -0.87 (0.092) | 2.87E-21 | -0.82 (0.112) | 2.81E-13 | -0.73 (0.083) | 4.17E-18 | -0.76 (0.092) | 1.21E-16  | -0.75 (0.071) | 1.48E-25 |
| rs4252198              | G/C                       | ++++                 | 1.25 (0.118)  | 2.44E-26 | 1.11 (0.137)  | 5.09E-16 | 1.18 (0.125)  | 6.04E-21 | 1.04 (0.134)  | 1.21E-14  | 1.14 (0.141)  | 1.31E-15 |
| rs12529361             | C/T                       | ++++                 | 0.37 (0.034)  | 3.88E-27 | 0.29 (0.048)  | 1.80E-09 | 0.32 (0.034)  | 5.06E-21 | 0.2 (0.036)   | 2.71E-08  | 0.34 (0.045)  | 4.07E-14 |
| rs2457574              | A/G                       | ----                 | -0.16 (0.023) | 6.47E-12 | -0.17 (0.034) | 4.71E-07 | -0.14 (0.026) | 4.77E-08 | -0.15 (0.027) | 6.18E-09  | -0.46 (0.03)  | 5.22E-52 |
| rs151181359            | C/A                       | ++?+?                | 1.14 (0.121)  | 3.75E-21 | 1.31 (0.208)  | 3.51E-10 |               |          | 1.5 (0.127)   | 1.70E-31  |               |          |
| rs41269133             | C/T                       | ----                 | -0.33 (0.042) | 8.24E-15 | -0.44 (0.066) | 3.67E-11 | -0.35 (0.044) | 6.13E-16 | -0.26 (0.049) | 1.24E-07  | -0.33 (0.043) | 2.39E-14 |
| rs12204009             | C/T                       | ++++                 | 1.93 (0.218)  | 8.62E-19 | 1.28 (0.223)  | 1.01E-08 | 1.49 (0.208)  | 8.92E-13 | 1.19 (0.203)  | 5.23E-09  | 1.51 (0.227)  | 3.12E-11 |
| rs142126734            | A/G                       | ++++                 | 0.43 (0.055)  | 3.05E-15 | 0.38 (0.076)  | 4.71E-07 | 0.33 (0.07)   | 2.39E-06 | 0.48 (0.061)  | 1.82E-15  | 0.6 (0.084)   | 1.43E-12 |
| rs78439586             | A/G                       | ----                 | -0.63 (0.062) | 2.25E-24 | -0.35 (0.088) | 8.45E-05 | -0.25 (0.057) | 1.11E-05 | -0.42 (0.055) | 2.21E-14  | -0.46 (0.074) | 3.16E-10 |
| rs6903649              | C/T                       | ----                 | -0.21 (0.027) | 1.87E-14 | -0.14 (0.041) | 9.09E-04 | -0.17 (0.029) | 1.02E-08 | -0.23 (0.031) | 3.25E-14  | -0.27 (0.037) | 8.00E-13 |
| rs7770628              | C/T                       | ++++                 | 0.15 (0.024)  | 6.26E-10 | 0.19 (0.035)  | 1.03E-07 | 0.2 (0.025)   | 1.68E-14 | 0.21 (0.026)  | 4.41E-15  | 0.14 (0.031)  | 3.35E-06 |
| rs141550222            | G/C                       | ----                 | -0.73 (0.086) | 1.15E-17 | -0.74 (0.115) | 1.08E-10 | -0.56 (0.089) | 3.79E-10 | -0.56 (0.09)  | 6.20E-10  | -0.33 (0.066) | 5.08E-07 |
| rs143665477            | C/T                       | ?+++?                |               |          | 1.43 (0.197)  | 3.81E-13 | 1.44 (0.152)  | 8.09E-21 | 1.36 (0.196)  | 5.89E-12  |               |          |
| rs184278183            | T/C                       | ++++                 | 1.4 (0.198)   | 1.59E-12 | 0.6 (0.191)   | 1.79E-03 | 0.66 (0.153)  | 1.50E-05 | 0.63 (0.176)  | 3.33E-04  | 1.47 (0.159)  | 7.18E-20 |
| rs62441903             | G/A                       | ----                 | -0.9 (0.153)  | 3.97E-09 | -0.78 (0.217) | 3.11E-04 | -0.46 (0.133) | 5.94E-04 | -0.96 (0.107) | 3.12E-19  | -1.25 (0.292) | 1.82E-05 |
| rs2489940              | T/G                       | ----                 | -0.96 (0.162) | 3.01E-09 | -0.72 (0.213) | 6.85E-04 | -0.53 (0.147) | 3.26E-04 | -0.75 (0.15)  | 5.06E-07  | -0.77 (0.097) | 2.21E-15 |
| rs147402310            | G/T                       | ?----                |               |          | -0.52 (0.146) | 3.29E-04 | -0.5 (0.104)  | 1.55E-06 | -0.68 (0.123) | 3.28E-08  | -0.73 (0.083) | 1.45E-18 |
| rs520829               | G/T                       | ----                 | -0.16 (0.023) | 7.52E-12 | -0.16 (0.034) | 2.64E-06 | -0.11 (0.026) | 1.10E-05 | -0.16 (0.026) | 7.36E-10  | -0.09 (0.031) | 2.62E-03 |

... to be continued

Table S5: continued

| SNP                     | Min_allele/<br>Ref_allele | Effect<br>Direction* | Colaus study  |          | FamHS study   |          | KORAF3 study  |          | KORAF4 study  |          | YFS study     |          |
|-------------------------|---------------------------|----------------------|---------------|----------|---------------|----------|---------------|----------|---------------|----------|---------------|----------|
|                         |                           |                      | $\beta$ (se)  | p-value  | $\beta$ (se)  | p-value  | $\beta$ (se)  | p-value  | $\beta$ (se)  | p-value  | $\beta$ (se)  | p-value  |
| <b>LPA gene region</b>  |                           |                      |               |          |               |          |               |          |               |          |               |          |
| rs6902316               | G/A                       | ++++?                | 0.69 (0.099)  | 3.81E-12 | 0.81 (0.173)  | 2.58E-06 | 0.87 (0.137)  | 2.51E-10 | 0.68 (0.148)  | 5.30E-06 |               |          |
| rs41259144              | T/C                       | -?---                | -0.94 (0.203) | 3.73E-06 |               |          | -0.79 (0.165) | 2.02E-06 | -0.79 (0.118) | 2.35E-11 | -1.08 (0.256) | 2.57E-05 |
| rs73596816              | A/G                       | ??+++                |               |          |               |          | 0.82 (0.136)  | 2.05E-09 | 0.49 (0.102)  | 1.59E-06 | 0.92 (0.177)  | 2.66E-07 |
| rs185934663             | G/T                       | ?----                |               |          | -1.04 (0.216) | 1.33E-06 | -0.58 (0.232) | 1.30E-02 | -1.29 (0.251) | 3.26E-07 | -0.68 (0.126) | 8.45E-08 |
| rs141463285             | A/T                       | ++?+?                | 1.05 (0.163)  | 8.96E-11 | 0.91 (0.195)  | 2.66E-06 |               |          | 0.7 (0.18)    | 1.06E-04 |               |          |
| rs116850263             | C/T                       | ??+++                |               |          |               |          | 0.76 (0.182)  | 3.44E-05 | 0.36 (0.195)  | 6.58E-02 | 0.57 (0.079)  | 6.39E-13 |
| rs1018234               | T/C                       | ----?                | -0.12 (0.025) | 1.04E-06 | -0.1 (0.038)  | 8.97E-03 | -0.11 (0.028) | 8.10E-05 | -0.13 (0.028) | 3.15E-06 |               |          |
| rs614754                | C/G                       | ?++++                |               |          | 0.86 (0.147)  | 5.09E-09 | 0.53 (0.163)  | 1.17E-03 | 0.47 (0.194)  | 1.44E-02 | 1.09 (0.231)  | 2.36E-06 |
| rs62440901              | T/C                       | +++++                | 0.15 (0.036)  | 1.87E-05 | 0.23 (0.046)  | 3.70E-07 | 0.09 (0.036)  | 9.15E-03 | 0.13 (0.036)  | 2.92E-04 | 0.08 (0.047)  | 7.50E-02 |
| rs76000021              | C/T                       | -----                | -0.39 (0.118) | 1.02E-03 | -0.66 (0.137) | 1.55E-06 | -0.54 (0.118) | 4.04E-06 | -0.23 (0.121) | 5.26E-02 | -0.26 (0.135) | 5.55E-02 |
| rs9458010               | C/T                       | +++++                | 0.07 (0.025)  | 4.41E-03 | 0.13 (0.038)  | 7.42E-04 | 0.12 (0.028)  | 1.25E-05 | 0.1 (0.029)   | 1.15E-03 | 0.07 (0.033)  | 4.59E-02 |
| rs187270959             | C/A                       | +++++                | 0.75 (0.198)  | 1.72E-04 | 0.4 (0.195)   | 3.91E-02 | 0.6 (0.162)   | 2.29E-04 | 0.59 (0.15)   | 8.70E-05 | 0.24 (0.209)  | 2.57E-01 |
| rs139699952             | C/G                       | ?++++                |               |          | 0.4 (0.128)   | 1.87E-03 | 0.18 (0.109)  | 9.86E-02 | 0.49 (0.098)  | 5.60E-07 | 0.39 (0.112)  | 5.78E-04 |
| rs150571318             | A/G                       | ???++                |               |          |               |          |               |          | 0.36 (0.211)  | 8.92E-02 | 0.65 (0.101)  | 1.04E-10 |
| rs143520616             | T/G                       | +++++                | 0.34 (0.098)  | 4.76E-04 | 0 (0.139)     | 9.95E-01 | 0.24 (0.095)  | 9.66E-03 | 0.33 (0.091)  | 3.69E-04 | 0.36 (0.185)  | 5.22E-02 |
| rs12664092              | C/A                       | +++++                | 0.19 (0.075)  | 1.22E-02 | 0.26 (0.121)  | 3.01E-02 | 0.15 (0.072)  | 3.74E-02 | 0.08 (0.074)  | 2.87E-01 | 0.43 (0.095)  | 4.73E-06 |
| rs117162385             | A/G                       | ?--?+                |               |          | -0.15 (0.295) | 6.21E-01 | -0.05 (0.236) | 8.18E-01 |               |          | 0.58 (0.102)  | 1.62E-08 |
| rs182532458             | A/G                       | ?--?+                |               |          | -0.07 (0.241) | 7.87E-01 | -0.32 (0.181) | 8.24E-02 |               |          | 0.64 (0.098)  | 7.74E-11 |
| rs79246098              | C/T                       | +++++                | 0.47 (0.19)   | 1.38E-02 | 0.14 (0.148)  | 3.55E-01 | 0.28 (0.135)  | 3.79E-02 | 0.18 (0.13)   | 1.67E-01 | 0.58 (0.212)  | 6.50E-03 |
| rs2457557               | T/C                       | ----+                | -0.12 (0.028) | 2.76E-05 | -0.07 (0.042) | 1.10E-01 | -0.03 (0.029) | 3.00E-01 | 0 (0.031)     | 9.63E-01 | 0.1 (0.038)   | 9.78E-03 |
| rs9457778               | T/C                       | ----+                | -0.05 (0.031) | 8.92E-02 | -0.02 (0.045) | 6.60E-01 | -0.02 (0.032) | 5.74E-01 | 0.03 (0.034)  | 3.44E-01 | -0.18 (0.033) | 6.23E-08 |
| rs2140650               | G/A                       | ++-++                | 0.01 (0.027)  | 6.72E-01 | 0.04 (0.04)   | 3.42E-01 | -0.03 (0.03)  | 3.45E-01 | 0.01 (0.031)  | 6.95E-01 | 0.28 (0.036)  | 3.51E-14 |
| rs2246531               | G/A                       | ----+                | -0.08 (0.028) | 2.25E-03 | -0.06 (0.042) | 1.48E-01 | -0.03 (0.03)  | 3.15E-01 | -0.01 (0.031) | 8.23E-01 | 0.3 (0.039)   | 2.50E-14 |
| <b>APOE gene region</b> |                           |                      |               |          |               |          |               |          |               |          |               |          |
| rs7412                  | T/C                       | ?----                | -0.62 (0.223) | 5.15E-03 | -0.18 (0.072) | 1.25E-02 | -0.22 (0.047) | 1.69E-06 | -0.12 (0.056) | 2.89E-02 | -0.22 (0.073) | 2.55E-03 |

All p-values are based on the inverse normal transformed Lp(a) values. All effect estimates refer to the minor allele derived from 1000G, phase1v3 (see Supplementary Table 3);

\*Order of included GWA studies: CoLaus, FamHS, KORA F3, KORA F4, YFS. +: positive effect from minor allele on inverse-normal transformed Lp(a) in that specific study, -: inverse effect from minor allele on inverse-normal transformed Lp(a) in that specific study;?: SNP not available in that study

**Table S6:** Results of the meta-analysis on the five cohorts on inverse-normal transformed Lp(a) values as well as Lp(a) on the original scale, adjusted on age and sex (model 1). The beta effect and effect direction refer to the minor allele. The Table is sorted by p-value.

| SNP                    | Min_allele/<br>Ref_allele | Effect<br>Direction* | Single SNP analysis, fixed effects model |                                |           | Single SNP analysis, heterogeneity and random effects model |                                               |                                                    |                       | Joint SNP analysis, fixed effects model, adjusted for all 49 independent SNPs |                                                          |                          |
|------------------------|---------------------------|----------------------|------------------------------------------|--------------------------------|-----------|-------------------------------------------------------------|-----------------------------------------------|----------------------------------------------------|-----------------------|-------------------------------------------------------------------------------|----------------------------------------------------------|--------------------------|
|                        |                           |                      | $\beta$ (se)<br>INT scale                | $\beta$ (se)<br>original scale | p-value   | $I^2$                                                       | $\beta_{RE}$ (se <sub>RE</sub> )<br>INT scale | $\beta_{RE}$ (se <sub>RE</sub> )<br>original scale | p-value <sub>RE</sub> | $\beta_{Joint}$ (se <sub>Joint</sub> )<br>INT scale                           | $\beta_{Joint}$ (se <sub>Joint</sub> )<br>original scale | p-value <sub>Joint</sub> |
| <b>LPA gene region</b> |                           |                      |                                          |                                |           |                                                             |                                               |                                                    |                       |                                                                               |                                                          |                          |
| rs118039278            | A/G                       | ++++                 | 1.22 (0.029)                             | 32.43 (0.657)                  | 1.36e-396 | 75.2                                                        | 1.22 (0.059)                                  | 32.15 (2.366)                                      | 0.00E+00              | 0.52(0.044)                                                                   | 16.92(1.051)                                             | 2.34E-32                 |
| rs56393506             | T/C                       | ++++                 | 0.68 (0.019)                             | 13.6 (0.419)                   | 7.76E-285 | 91.8                                                        | 0.66 (0.066)                                  | 15.42 (3.026)                                      | 7.02E-291             | 0.17(0.027)                                                                   | 2.85(0.593)                                              | 1.88E-10                 |
| rs186696265            | T/C                       | ++++                 | 2.02 (0.062)                             | 64.74 (1.341)                  | 4.15E-231 | 86.4                                                        | 2.03 (0.17)                                   | 67.48 (8.602)                                      | 1.47E-233             | 1.53(0.079)                                                                   | 47.6(1.792)                                              | 1.28E-84                 |
| rs4252185              | C/T                       | ++++                 | 0.92 (0.03)                              | 23.93 (0.656)                  | 5.31E-211 | 77.3                                                        | 0.92 (0.063)                                  | 25.65 (3.644)                                      | 2.21E-211             | 0.29(0.039)                                                                   | 7.6(0.904)                                               | 4.35E-14                 |
| rs1510224              | C/T                       | ++++                 | 1.35 (0.05)                              | 45.84 (1.115)                  | 4.27E-160 | 71.7                                                        | 1.35 (0.096)                                  | 45.98 (4.627)                                      | 2.95E-160             | 0.68(0.062)                                                                   | 26.38(1.416)                                             | 3.79E-28                 |
| rs6938647              | A/C                       | ----                 | -0.37 (0.016)                            | -5.47 (0.362)                  | 7.48E-119 | 61.6                                                        | -0.36 (0.026)                                 | -5.57 (0.512)                                      | 1.66E-118             | -0.25(0.026)                                                                  | 4.35(0.58)                                               | 6.21E-22                 |
| rs4252109              | G/T                       | ----                 | -0.29 (0.013)                            | -4.91 (0.303)                  | 4.86E-105 | 0                                                           |                                               |                                                    |                       | -0.17(0.017)                                                                  | -3.11(0.378)                                             | 3.15E-25                 |
| rs41272114             | T/C                       | ----                 | -0.78 (0.04)                             | -8.63 (0.821)                  | 4.74E-86  | 0                                                           |                                               |                                                    |                       | -0.48(0.043)                                                                  | -2.43(0.881)                                             | 7.98E-29                 |
| rs4252198              | G/C                       | ++++                 | 1.15 (0.059)                             | 27.97 (1.316)                  | 2.72E-84  | 0                                                           |                                               |                                                    |                       | 0.76(0.062)                                                                   | 18.07(1.394)                                             | 8.32E-34                 |
| rs12529361             | C/T                       | ++++                 | 0.3 (0.017)                              | 4.97 (0.394)                   | 5.57E-69  | 68.8                                                        | 0.3 (0.031)                                   | 4.95 (0.922)                                       | 4.29E-69              | 0.27(0.02)                                                                    | 4.8(0.445)                                               | 3.77E-42                 |
| rs2457574              | A/G                       | ----                 | -0.21 (0.012)                            | -4.75 (0.277)                  | 2.77E-63  | 95.5                                                        | -0.22 (0.058)                                 | -4.5 (0.575)                                       | 1.76E-77              | -0.2(0.02)                                                                    | -5.08(0.422)                                             | 1.80E-25                 |
| rs151181359            | C/A                       | ++?+?                | 1.31 (0.082)                             | 39.56 (2.035)                  | 1.55E-57  | 51.1                                                        | 1.32 (0.123)                                  | 38.58 (5.875)                                      | 4.47E-57              | 0.56(0.09)                                                                    | 10.41(2.257)                                             | 3.66E-10                 |
| rs41269133             | C/T                       | ----                 | -0.33 (0.021)                            | -5.72 (0.457)                  | 5.42E-55  | 15.4                                                        |                                               |                                                    |                       | -0.2(0.028)                                                                   | -2.59(0.591)                                             | 1.79E-13                 |
| rs12204009             | C/T                       | ++++                 | 1.47 (0.098)                             | 32.86 (2.319)                  | 2.80E-51  | 42.7                                                        |                                               |                                                    |                       | 0.66(0.102)                                                                   | 11.49(2.408)                                             | 7.00E-11                 |
| rs142126734            | A/G                       | ++++                 | 0.44 (0.03)                              | 6.58 (0.699)                   | 8.52E-48  | 43                                                          |                                               |                                                    |                       | 0.31(0.035)                                                                   | 4.1(0.798)                                               | 7.42E-19                 |
| rs78439586             | A/G                       | ----                 | -0.42 (0.029)                            | -6.68 (0.661)                  | 1.28E-47  | 80.8                                                        | -0.42 (0.068)                                 | -7.04 (1.214)                                      | 4.83E-49              | -0.27(0.032)                                                                  | -3.99(0.724)                                             | 1.70E-17                 |
| rs6903649              | C/T                       | ----                 | -0.2 (0.014)                             | -2.6 (0.33)                    | 3.91E-45  | 49.5                                                        |                                               |                                                    |                       | -0.18(0.028)                                                                  | 1.55(0.634)                                              | 8.27E-11                 |
| rs7770628              | C/T                       | ++++                 | 0.18 (0.012)                             | 4.73 (0.279)                   | 4.80E-45  | 9.5                                                         |                                               |                                                    |                       | 0.31(0.021)                                                                   | -7.28(0.482)                                             | 8.08E-47                 |
| rs141550222            | G/C                       | ----                 | -0.54 (0.039)                            | -6.71 (0.781)                  | 6.73E-44  | 77.7                                                        | -0.57 (0.084)                                 | -9.29 (2.253)                                      | 6.10E-45              | -0.32(0.044)                                                                  | -1.73(0.891)                                             | 5.69E-13                 |
| rs143665477            | C/T                       | ?+++?                | 1.41 (0.105)                             | 39.71 (2.611)                  | 2.63E-41  | 0                                                           |                                               |                                                    |                       | 0.68(0.11)                                                                    | 20.65(2.757)                                             | 8.28E-10                 |
| rs184278183            | T/C                       | ++++                 | 0.95 (0.079)                             | 26.25 (1.663)                  | 9.36E-34  | 84.1                                                        | 0.95 (0.198)                                  | 25.27 (4.554)                                      | 7.03E-36              | 0.66(0.082)                                                                   | 21.34(1.743)                                             | 8.01E-16                 |
| rs62441903             | G/A                       | ----                 | -0.82 (0.069)                            | -14.36 (1.657)                 | 4.86E-33  | 64.5                                                        | -0.83 (0.125)                                 | -14.36 (1.657)                                     | 4.38E-33              | -0.69(0.07)                                                                   | -10.36(1.688)                                            | 6.83E-23                 |
| rs2489940              | T/G                       | ----                 | -0.75 (0.063)                            | -8.69 (1.231)                  | 1.67E-32  | 0                                                           |                                               |                                                    |                       | -0.44(0.065)                                                                  | -5.11(1.268)                                             | 1.07E-11                 |
| rs147402310            | G/T                       | ?----                | -0.63 (0.054)                            | -7.19 (1.053)                  | 8.97E-32  | 19.5                                                        |                                               |                                                    |                       | -0.51(0.055)                                                                  | -5.58(1.064)                                             | 1.21E-20                 |
| rs520829               | G/T                       | ----                 | -0.14 (0.012)                            | -3.58 (0.28)                   | 2.65E-29  | 17.7                                                        |                                               |                                                    |                       | -0.16(0.022)                                                                  | -2.06(0.452)                                             | 2.34E-12                 |

... to be continued

Table S6: continued

| SNP                     | Min_allele/<br>Ref_allele | Effect<br>Direction* | Single SNP analysis, fixed effects model |                                |          | Single SNP analysis, heterogeneity and random effects model |                                               |                                                    |                       | Joint SNP analysis, fixed effects model, adjusted for all 49 independent SNPs |                                                          |                          |
|-------------------------|---------------------------|----------------------|------------------------------------------|--------------------------------|----------|-------------------------------------------------------------|-----------------------------------------------|----------------------------------------------------|-----------------------|-------------------------------------------------------------------------------|----------------------------------------------------------|--------------------------|
|                         |                           |                      | $\beta$ (se)<br>INT scale                | $\beta$ (se)<br>original scale | p-value  | $I^2$                                                       | $\beta_{RE}$ (se <sub>RE</sub> )<br>INT scale | $\beta_{RE}$ (se <sub>RE</sub> )<br>original scale | p-value <sub>RE</sub> | $\beta_{Joint}$ (se <sub>Joint</sub> )<br>INT scale                           | $\beta_{Joint}$ (se <sub>Joint</sub> )<br>original scale | p-value <sub>Joint</sub> |
| <b>LPA gene region</b>  |                           |                      |                                          |                                |          |                                                             |                                               |                                                    |                       |                                                                               |                                                          |                          |
| rs6902316               | G/A                       | ++++?                | 0.74 (0.066)                             | 19.15 (1.684)                  | 4.30E-29 | 0                                                           |                                               |                                                    |                       | 0.46(0.071)                                                                   | 11.93(1.813)                                             | 8.45E-11                 |
| rs41259144              | T/C                       | -?---                | -0.85 (0.084)                            | -14.27 (1.936)                 | 4.45E-24 | 0                                                           |                                               |                                                    |                       | -0.6(0.085)                                                                   | -7.52(1.963)                                             | 2.01E-12                 |
| rs73596816              | A/G                       | ??+++                | 0.66 (0.075)                             | 11.2 (1.664)                   | 1.53E-18 | 66.8                                                        | 0.72 (0.138)                                  | 11.57 (2.267)                                      | 1.80E-18              | 0.58(0.078)                                                                   | 10.33(1.705)                                             | 9.61E-14                 |
| rs185934663             | G/T                       | ?----                | -0.81 (0.093)                            | -6.83 (1.709)                  | 4.58E-18 | 54.8                                                        | -0.86 (0.152)                                 | -8.56 (2.725)                                      | 8.04E-18              | -0.64(0.095)                                                                  | -4.94(1.733)                                             | 1.44E-11                 |
| rs141463285             | A/T                       | ++?+?                | 0.9 (0.104)                              | 24.12 (2.622)                  | 6.28E-18 | 3.2                                                         |                                               |                                                    |                       | 0.65(0.108)                                                                   | 20.82(2.705)                                             | 1.87E-09                 |
| rs116850263             | C/T                       | ??+++                | 0.57 (0.069)                             | 4.89 (1.169)                   | 1.01E-16 | 6.1                                                         |                                               |                                                    |                       | 0.42(0.07)                                                                    | 2.9(1.182)                                               | 1.42E-09                 |
| rs1018234               | T/C                       | ----?                | -0.12 (0.015)                            | -2.49 (0.372)                  | 6.30E-16 | 0                                                           |                                               |                                                    |                       | 0.3(0.029)                                                                    | 4.63(0.608)                                              | 3.20E-24                 |
| rs614754                | C/G                       | ?++++                | 0.72 (0.09)                              | 16.12 (2.003)                  | 1.43E-15 | 52.7                                                        | 0.72 (0.133)                                  |                                                    | 2.39E-15              | 0.58(0.091)                                                                   | -12.1(2.026)                                             | 2.35E-10                 |
| rs62440901              | T/C                       | +++++                | 0.14 (0.018)                             | 2.05 (0.405)                   | 3.11E-14 | 42.9                                                        |                                               |                                                    |                       | 0.12(0.018)                                                                   | 2.62(0.415)                                              | 5.39E-11                 |
| rs76000021              | C/T                       | -----                | -0.41 (0.057)                            | -7.54 (1.266)                  | 4.70E-13 | 47.9                                                        |                                               |                                                    |                       | -0.41(0.058)                                                                  | -5.84(1.291)                                             | 2.28E-12                 |
| rs9458010               | C/T                       | +++++                | 0.09 (0.014)                             | 2.84 (0.302)                   | 4.11E-12 | 0                                                           |                                               |                                                    |                       | 0.14(0.019)                                                                   | 3.01(0.428)                                              | 6.02E-13                 |
| rs187270959             | C/A                       | +++++                | 0.53 (0.081)                             | 12.38 (1.828)                  | 4.63E-11 | 0                                                           |                                               |                                                    |                       | 0.57(0.082)                                                                   | 13.15(1.845)                                             | 3.81E-12                 |
| rs139699952             | C/G                       | ?++++                | 0.37 (0.056)                             | 6.79 (1.187)                   | 4.70E-11 | 33.1                                                        |                                               |                                                    |                       | 0.33(0.057)                                                                   | 6.92(1.198)                                              | 5.79E-09                 |
| rs150571318             | A/G                       | ???++                | 0.6 (0.092)                              | 6.55 (1.514)                   | 6.90E-11 | 35                                                          |                                               |                                                    |                       | 0.54(0.093)                                                                   | 5.82(1.522)                                              | 6.59E-09                 |
| rs143520616             | T/G                       | +++++                | 0.27 (0.05)                              | 2.39 (1.194)                   | 5.01E-08 | 14.9                                                        |                                               |                                                    |                       | 0.31(0.05)                                                                    | 3.82(1.205)                                              | 9.63E-10                 |
| rs12664092              | C/A                       | +++++                | 0.2 (0.038)                              | 5.4 (0.846)                    | 1.92E-07 | 57.1                                                        | 0.21 (0.059)                                  | 5.42 (1.599)                                       | 1.81E-07              | 0.5(0.043)                                                                    | 11.41(0.959)                                             | 3.67E-31                 |
| rs117162385             | A/G                       | ?--?+                | 0.43 (0.091)                             | 2.78 (1.522)                   | 2.71E-06 | 79.5                                                        | 0.18 (0.268)                                  | -1.24 (4.438)                                      | 6.50E-07              | 0.53(0.091)                                                                   | 4.66(1.525)                                              | 6.60E-09                 |
| rs182532458             | A/G                       | ?--?+                | 0.37 (0.082)                             | 4.36 (1.425)                   | 5.75E-06 | 91.8                                                        | 0.1 (0.344)                                   | -0.87 (4.864)                                      | 2.57E-09              | 0.7(0.084)                                                                    | 8.06(1.438)                                              | 7.41E-17                 |
| rs79246098              | C/T                       | +++++                | 0.28 (0.07)                              | 0.24 (1.627)                   | 7.53E-05 | 7.4                                                         |                                               |                                                    |                       | 0.4(0.072)                                                                    | 5.15(1.661)                                              | 2.18E-08                 |
| rs2457557               | T/C                       | ----+                | -0.05 (0.016)                            | -2.39 (0.403)                  | 5.60E-04 | 65.6                                                        | -0.05 (0.028)                                 | -2.41 (0.616)                                      | 2.76E-04              | -0.25(0.033)                                                                  | 2.72(0.682)                                              | 1.17E-13                 |
| rs9457778               | T/C                       | ----+                | -0.05 (0.015)                            | -0.05 (0.336)                  | 8.75E-04 | 81.8                                                        | -0.05 (0.037)                                 | 0.31 (0.676)                                       | 7.28E-06              | -0.11(0.016)                                                                  | -2.17(0.344)                                             | 1.16E-12                 |
| rs2140650               | G/A                       | ++-++                | 0.05 (0.015)                             | 0.94 (0.328)                   | 1.10E-03 | 91.7                                                        | 0.06 (0.051)                                  | 0.54 (0.86)                                        | 1.62E-10              | 0.09(0.015)                                                                   | -1.97(0.336)                                             | 5.04E-10                 |
| rs2246531               | G/A                       | ----+                | 0 (0.015)                                | -1.04 (0.339)                  | 8.48E-01 | 94.3                                                        | 0.02 (0.063)                                  | -1.47 (0.997)                                      | 2.17E-12              | 0.31(0.034)                                                                   | -2.2(0.653)                                              | 1.67E-19                 |
| <b>APOE gene region</b> |                           |                      |                                          |                                |          |                                                             |                                               |                                                    |                       |                                                                               |                                                          |                          |
| rs7412                  | T/C                       | ?----                | -0.19 (0.030)                            | -3.34 (0.668)                  | 3.47e-10 | 0                                                           |                                               |                                                    |                       |                                                                               |                                                          |                          |

All p-values are based on the inverse normal transformed Lp(a) values. All effect estimates refer to the minor allele derived from 1000G, phase1v3 (see Supplementary Table 3);

\*Order of included GWA studies: CoLaus, FamHS, KORA F3, KORA F4, YFS. +: positive effect from minor allele on inverse-normal transformed Lp(a) in that specific study, -: inverse effect from minor allele on inverse-normal transformed Lp(a) in that specific study;?: SNP not available in that study



**Table S7:** Results of the meta-analysis on the five cohorts on inverse-normal transformed Lp(a) values adjusted on age, sex and the predominantly expressed apo(a) isoform (model 2). The beta effect and effect direction refer to the minor allele. The Table is sorted according to the p-value of the meta-analysis results (as in Table S8).

| SNP                    | Min_allele/<br>Ref_allele | Effect<br>Direction* | Colaus study  |          | FamHS study   |          | KORAF3 study  |          | KORAF4 study  |          | YFS study     |          |
|------------------------|---------------------------|----------------------|---------------|----------|---------------|----------|---------------|----------|---------------|----------|---------------|----------|
|                        |                           |                      | $\beta$ (se)  | p-value  | $\beta$ (se)  | p-value  | $\beta$ (se)  | p-value  | $\beta$ (se)  | p-value  | $\beta$ (se)  | p-value  |
| <b>LPA gene region</b> |                           |                      |               |          |               |          |               |          |               |          |               |          |
| rs75692336             | A/C                       | -----                | -0.65 (0.036) | 3.81E-74 | -0.19 (0.044) | 1.18E-05 | -0.61 (0.036) | 2.03E-61 | -0.64 (0.038) | 6.97E-63 | -0.61 (0.05)  | 1.41E-33 |
| rs140570886            | C/T                       | +++++                | 2.01 (0.108)  | 5.38E-77 | 0.96 (0.103)  | 9.75E-21 | 1.77 (0.113)  | 5.91E-53 | 1.58 (0.114)  | 5.88E-42 | 1.94 (0.151)  | 2.03E-36 |
| rs186696265            | T/C                       | +++++                | 2.59 (0.139)  | 4.12E-78 | 1.02 (0.116)  | 2.84E-18 | 1.94 (0.125)  | 5.58E-52 | 1.76 (0.126)  | 4.21E-43 | 2.14 (0.16)   | 2.94E-39 |
| rs7769879              | C/G                       | +++++                | 0.36 (0.024)  | 1.51E-52 | 0.23 (0.029)  | 2.37E-15 | 0.35 (0.026)  | 6.73E-40 | 0.28 (0.027)  | 1.71E-23 | 0.49 (0.032)  | 1.65E-51 |
| rs55730499             | T/C                       | +++++                | 0.78 (0.064)  | 1.21E-34 | 0.47 (0.059)  | 2.23E-15 | 0.92 (0.062)  | 5.16E-49 | 0.82 (0.054)  | 1.17E-49 | 1.07 (0.094)  | 4.63E-29 |
| rs188974863            | A/T                       | -----                | -0.76 (0.052) | 1.03E-48 | -0.19 (0.059) | 9.29E-04 | -0.51 (0.049) | 2.35E-25 | -0.53 (0.052) | 1.25E-24 | -0.54 (0.055) | 7.12E-23 |
| rs56393506             | T/C                       | +++++                | 0.45 (0.04)   | 1.49E-29 | 0.31 (0.045)  | 2.33E-12 | 0.47 (0.039)  | 2.96E-33 | 0.46 (0.038)  | 9.46E-33 | 0.26 (0.045)  | 7.35E-09 |
| rs75234242             | A/G                       | -----                | -1.05 (0.08)  | 3.63E-39 | -0.42 (0.102) | 3.37E-05 | -0.69 (0.078) | 7.37E-19 | -0.77 (0.079) | 6.08E-22 | -0.91 (0.088) | 1.86E-24 |
| rs6938647              | A/C                       | -----                | -0.28 (0.029) | 1.25E-21 | -0.35 (0.038) | 8.14E-20 | -0.25 (0.032) | 1.23E-14 | -0.32 (0.033) | 1.50E-21 | -0.37 (0.041) | 7.36E-19 |
| rs59614420             | A/G                       | -----                | -0.25 (0.024) | 6.27E-24 | -0.24 (0.031) | 1.65E-14 | -0.23 (0.028) | 4.43E-17 | -0.22 (0.028) | 2.01E-14 | -0.27 (0.035) | 2.45E-14 |
| rs142126734            | A/G                       | +++++                | 0.52 (0.054)  | 4.12E-22 | 0.44 (0.062)  | 9.96E-13 | 0.31 (0.07)   | 9.45E-06 | 0.53 (0.061)  | 4.25E-18 | 0.43 (0.085)  | 3.51E-07 |
| rs4252198              | G/C                       | +++++                | 0.81 (0.118)  | 7.29E-12 | 0.53 (0.114)  | 4.14E-06 | 0.87 (0.126)  | 6.03E-12 | 0.61 (0.135)  | 6.87E-06 | 0.9 (0.142)   | 2.82E-10 |
| rs12207325             | A/G                       | -----                | -1.14 (0.163) | 3.06E-12 | -0.48 (0.158) | 2.28E-03 | -1.09 (0.128) | 2.23E-17 | -0.64 (0.173) | 2.38E-04 | -1.46 (0.231) | 2.92E-10 |
| rs145470851            | A/G                       | -----                | -1.22 (0.136) | 3.08E-19 | -0.26 (0.175) | 1.45E-01 | -0.75 (0.151) | 6.76E-07 | -0.86 (0.136) | 2.93E-10 | -1.15 (0.248) | 3.93E-06 |
| rs9365169              | G/C                       | -----                | -0.16 (0.023) | 1.05E-12 | -0.06 (0.028) | 3.31E-02 | -0.21 (0.025) | 1.82E-16 | -0.15 (0.026) | 1.10E-08 | -0.06 (0.031) | 6.09E-02 |
| rs78439586             | A/G                       | -----                | -0.47 (0.062) | 5.28E-14 | -0.33 (0.072) | 4.55E-06 | -0.19 (0.058) | 8.43E-04 | -0.3 (0.055)  | 9.66E-08 | -0.34 (0.075) | 4.59E-06 |
| rs117026595            | T/A                       | ??---                |               |          |               |          | -0.96 (0.128) | 9.80E-14 | -0.71 (0.135) | 1.65E-07 | -1.08 (0.163) | 5.65E-11 |
| rs41272114             | T/C                       | -----                | -0.49 (0.092) | 1.02E-07 | -0.58 (0.094) | 9.98E-10 | -0.38 (0.088) | 1.69E-05 | -0.25 (0.097) | 9.94E-03 | -0.36 (0.078) | 3.83E-06 |
| rs112842440            | T/G                       | +++++                | 0.67 (0.122)  | 4.44E-08 | 0.57 (0.111)  | 3.09E-07 | 0.45 (0.109)  | 3.99E-05 | 0.51 (0.104)  | 8.59E-07 | 0.37 (0.126)  | 3.02E-03 |
| rs12664092             | C/A                       | +++++                | 0.44 (0.075)  | 4.13E-09 | 0.32 (0.098)  | 1.28E-03 | 0.35 (0.072)  | 1.01E-06 | 0.25 (0.074)  | 6.49E-04 | 0.48 (0.094)  | 5.16E-07 |
| rs147010904            | T/C                       | ++++?                | 0.9 (0.149)   | 1.28E-09 | 0.46 (0.152)  | 2.51E-03 | 0.8 (0.161)   | 7.90E-07 | 0.78 (0.181)  | 1.88E-05 |               |          |
| rs149302195            | T/C                       | -?---                | -0.82 (0.182) | 6.15E-06 |               |          | -0.68 (0.2)   | 7.47E-04 | -0.39 (0.148) | 8.14E-03 | -0.79 (0.128) | 6.22E-10 |
| rs141463285            | A/T                       | ++?+?                | 1.06 (0.162)  | 6.12E-11 | 0.61 (0.157)  | 9.20E-05 |               |          | 0.58 (0.181)  | 1.40E-03 |               |          |
| rs147555597            | A/G                       | +++??                | 0.79 (0.168)  | 2.47E-06 | 0.8 (0.182)   | 1.08E-05 | 0.7 (0.161)   | 1.43E-05 |               |          |               |          |
| rs41267809             | G/A                       | -----                | -0.18 (0.122) | 1.40E-01 | -0.4 (0.135)  | 3.06E-03 | -0.21 (0.11)  | 5.90E-02 | -0.54 (0.085) | 2.51E-10 | -0.1 (0.271)  | 7.21E-01 |
| rs9295143              | G/C                       | +++++                | 0.18 (0.075)  | 1.43E-02 | 0.24 (0.072)  | 6.74E-04 | 0.15 (0.067)  | 2.09E-02 | 0.12 (0.061)  | 5.49E-02 | 0.2 (0.064)   | 2.24E-03 |
| rs41267807             | C/T                       | +-----               | 0.03 (0.113)  | 8.21E-01 | -0.39 (0.109) | 3.39E-04 | -0.26 (0.119) | 2.86E-02 | -0.19 (0.119) | 1.14E-01 | -0.78 (0.134) | 7.30E-09 |
| rs182532458            | A/G                       | ?--?+                |               |          | -0.03 (0.195) | 8.77E-01 | -0.05 (0.181) | 7.97E-01 |               |          | 0.46 (0.099)  | 2.92E-06 |

... to be continued

**Table S7: continued**

| SNP                     | Min_allele/<br>Ref_allele | Effect<br>Direction* | ColaUS study  |          | FamHS study   |          | KORAF3 study  |          | KORAF4 study  |          | YFS study     |          |
|-------------------------|---------------------------|----------------------|---------------|----------|---------------|----------|---------------|----------|---------------|----------|---------------|----------|
|                         |                           |                      | $\beta$ (se)  | p-value  | $\beta$ (se)  | p-value  | $\beta$ (se)  | p-value  | $\beta$ (se)  | p-value  | $\beta$ (se)  | p-value  |
| <b>LPA gene region</b>  |                           |                      |               |          |               |          |               |          |               |          |               |          |
| rs62440901              | T/C                       | +++-                 | 0.08 (0.036)  | 2.19E-02 | 0.15 (0.037)  | 5.60E-05 | -0.01 (0.036) | 7.12E-01 | 0.03 (0.036)  | 4.18E-01 | -0.03 (0.048) | 4.98E-01 |
| rs3798221               | T/G                       | --++                 | -0.04 (0.029) | 1.55E-01 | -0.1 (0.035)  | 5.92E-03 | 0.01 (0.033)  | 8.25E-01 | -0.04 (0.033) | 1.79E-01 | 0.05 (0.036)  | 1.45E-01 |
| <b>APOE gene region</b> |                           |                      |               |          |               |          |               |          |               |          |               |          |
| rs7412                  | T/C                       | ?----                |               |          | -0.12 (0.058) | 4.72E-02 | -0.25 (0.047) | 6.09E-08 | -0.08 (0.056) | 1.45E-01 | -0.19 (0.074) | 9.68E-03 |

All p-values are based on the inverse-normal transformed Lp(a) values. All effect estimates refer to the minor allele derived from 1000G, phase1v3 (see Supplementary Table 3);

\*Order of included GWA studies: CoLaUS, FamHS, KORA F3, KORA F4, YFS. +: positive effect from minor allele on inverse-normal transformed Lp(a) in that specific study, -: inverse effect from minor allele on inverse-normal transformed Lp(a) in that specific study;?: SNP not available in that study

**Table S8:** Results of the meta-analysis on the five cohorts on inverse-normal transformed Lp(a) values adjusted on age, sex and the predominantly expressed apo(a) isoform (model 2). The beta effect and effect direction refer to the minor allele. The Table is sorted by p-value.

| SNP                    | Min_allele/<br>Ref_allele | Effect<br>Direction* | Single SNP analysis, fixed effects model |                                |           | Single SNP analysis, heterogeneity and random effects model |                                               |                                                    |                       | Joint SNP analysis, fixed effects model, adjusted for all 31 independent SNPs |                                                          |                          |
|------------------------|---------------------------|----------------------|------------------------------------------|--------------------------------|-----------|-------------------------------------------------------------|-----------------------------------------------|----------------------------------------------------|-----------------------|-------------------------------------------------------------------------------|----------------------------------------------------------|--------------------------|
|                        |                           |                      | $\beta$ (se)<br>INT scale                | $\beta$ (se)<br>original scale | p-value   | I <sup>2</sup>                                              | $\beta_{RE}$ (se <sub>RE</sub> )<br>INT scale | $\beta_{RE}$ (se <sub>RE</sub> )<br>original scale | p-value <sub>RE</sub> | $\beta_{Joint}$ (se <sub>Joint</sub> )<br>INT scale                           | $\beta_{Joint}$ (se <sub>Joint</sub> )<br>original scale | p-value <sub>Joint</sub> |
| <b>LPA gene region</b> |                           |                      |                                          |                                |           |                                                             |                                               |                                                    |                       |                                                                               |                                                          |                          |
| rs75692336             | A/C                       | -----                | -0.56 (0.018)                            | -9.67 (0.358)                  | 2.90E-216 | 95.2                                                        | -0.54 (0.082)                                 | -9.89 (1.512)                                      | 4.30E-229             | -0.46(0.024)                                                                  | -7.38(0.469)                                             | 4.91E-85                 |
| rs140570886            | C/T                       | +++++                | 1.61 (0.052)                             | 43.43 (1.008)                  | 1.72E-210 | 93.2                                                        | 1.65 (0.2)                                    | 43.85 (4.736)                                      | 1.16E-218             | 0.83(0.076)                                                                   | 23.78(1.519)                                             | 7.49E-28                 |
| rs186696265            | T/C                       | +++++                | 1.82 (0.059)                             | 49.06 (1.129)                  | 2.08E-207 | 95.1                                                        | 1.89 (0.269)                                  | 51.13 (6.921)                                      | 3.09E-220             | 0.85(0.088)                                                                   | 24.75(1.755)                                             | 4.30E-22                 |
| rs7769879              | C/G                       | +++++                | 0.34 (0.012)                             | 6.74 (0.238)                   | 4.43E-168 | 91                                                          | 0.34 (0.041)                                  | 6.79 (0.451)                                       | 2.80E-173             | 0.24(0.019)                                                                   | 4.69(0.373)                                              | 1.05E-35                 |
| rs55730499             | T/C                       | +++++                | 0.78 (0.029)                             | 16.77 (0.584)                  | 3.97E-163 | 90.4                                                        | 0.81 (0.094)                                  | 16.84 (1.311)                                      | 7.57E-168             | 0.39(0.036)                                                                   | 10.18(0.722)                                             | 3.24E-27                 |
| rs188974863            | A/T                       | -----                | -0.53 (0.024)                            | -9.13 (0.452)                  | 1.92E-107 | 92.3                                                        | -0.51 (0.086)                                 | -10.01 (1.617)                                     | 3.37E-114             | -0.29(0.026)                                                                  | -5.17(0.496)                                             | 2.25E-28                 |
| rs56393506             | T/C                       | +++++                | 0.4 (0.019)                              | 7.07 (0.356)                   | 2.81E-105 | 80.3                                                        | 0.4 (0.042)                                   | 7.92 (1.578)                                       | 2.87E-106             | 0.17(0.024)                                                                   | 3.12(0.445)                                              | 7.77E-13                 |
| rs75234242             | A/G                       | -----                | -0.79 (0.038)                            | -13.59 (0.721)                 | 3.78E-97  | 85.1                                                        | -0.77 (0.099)                                 | -14.52 (1.909)                                     | 3.40E-99              | -0.39(0.042)                                                                  | -6.49(0.802)                                             | 1.36E-20                 |
| rs6938647              | A/C                       | -----                | -0.3 (0.015)                             | -5.48 (0.3)                    | 2.36E-87  | 45.5                                                        |                                               |                                                    |                       | -0.27(0.019)                                                                  | 4.12(0.377)                                              | 5.75E-43                 |
| rs59614420             | A/G                       | -----                | -0.24 (0.013)                            | -4.48 (0.253)                  | 1.39E-76  | 0                                                           |                                               |                                                    |                       | -0.13(0.015)                                                                  | -2.11(0.289)                                             | 5.85E-18                 |
| rs142126734            | A/G                       | +++++                | 0.46 (0.029)                             | 7.77 (0.577)                   | 2.70E-57  | 45.5                                                        |                                               |                                                    |                       | 0.35(0.031)                                                                   | 6.09(0.615)                                              | 2.42E-29                 |
| rs4252198              | G/C                       | +++++                | 0.73 (0.057)                             | 14.9 (1.105)                   | 3.69E-38  | 42.6                                                        |                                               |                                                    |                       | 0.5(0.058)                                                                    | 10.09(1.138)                                             | 9.43E-18                 |
| rs12207325             | A/G                       | -----                | -0.93 (0.073)                            | -14.8 (1.48)                   | 2.50E-37  | 78.9                                                        | -0.95 (0.163)                                 | -14.67 (1.812)                                     | 2.87E-38              | -0.71(0.076)                                                                  | -10.49(1.539)                                            | 1.53E-20                 |
| rs145470851            | A/G                       | -----                | -0.86 (0.071)                            | -15.97 (1.449)                 | 8.83E-34  | 80.2                                                        | -0.84 (0.164)                                 | -15.42 (2.957)                                     | 5.17E-35              | -0.5(0.075)                                                                   | -9.76(1.514)                                             | 2.34E-11                 |
| rs9365169              | G/C                       | -----                | -0.14 (0.012)                            | -2.05 (0.231)                  | 4.23E-31  | 82.7                                                        | -0.13 (0.029)                                 | -2.27 (0.594)                                      | 7.89E-33              | 0.14(0.019)                                                                   | -2.91(0.36)                                              | 2.53E-13                 |
| rs78439586             | A/G                       | -----                | -0.32 (0.028)                            | -5.91 (0.551)                  | 3.30E-29  | 62.7                                                        | -0.32 (0.047)                                 | -6.18 (1.007)                                      | 3.29E-29              | -0.17(0.031)                                                                  | -3.34(0.589)                                             | 2.32E-08                 |
| rs117026595            | T/A                       | ??---                | -0.9 (0.082)                             | -13.81 (1.45)                  | 2.61E-28  | 39                                                          |                                               |                                                    |                       | -0.68(0.084)                                                                  | -10.07(1.48)                                             | 2.61E-16                 |
| rs41272114             | T/C                       | -----                | -0.41 (0.04)                             | -5.73 (0.723)                  | 2.97E-24  | 41.8                                                        |                                               |                                                    |                       | -0.38(0.042)                                                                  | -4.7(0.759)                                              | 7.95E-20                 |
| rs112842440            | T/G                       | +++++                | 0.51 (0.051)                             | 6.85 (0.984)                   | 1.06E-23  | 0                                                           |                                               |                                                    |                       | 0.39(0.053)                                                                   | 5.4(1.01)                                                | 2.04E-13                 |
| rs12664092             | C/A                       | +++++                | 0.36 (0.036)                             | 7.17 (0.701)                   | 1.72E-23  | 17.6                                                        |                                               |                                                    |                       | 0.34(0.039)                                                                   | 6.35(0.739)                                              | 1.85E-18                 |
| rs147010904            | T/C                       | ++++?                | 0.73 (0.081)                             | 18.38 (1.783)                  | 9.25E-20  | 35.5                                                        |                                               |                                                    |                       | 0.53(0.089)                                                                   | 13.04(1.968)                                             | 2.93E-09                 |
| rs149302195            | T/C                       | -?---                | -0.67 (0.079)                            | -10.14 (1.312)                 | 2.32E-17  | 41.2                                                        |                                               |                                                    |                       | -0.48(0.08)                                                                   | -7.71(1.328)                                             | 2.89E-09                 |
| rs141463285            | A/T                       | ++?+?                | 0.76 (0.097)                             | 17.96 (2.151)                  | 3.27E-15  | 61.6                                                        | 0.75 (0.156)                                  | 17.81 (4.066)                                      | 4.52E-15              | 0.6(0.098)                                                                    | 15.42(2.178)                                             | 9.42E-10                 |
| rs147555597            | A/G                       | +++??                | 0.76 (0.099)                             | 21.1 (2.227)                   | 1.63E-14  | 0                                                           |                                               |                                                    |                       | 0.63(0.109)                                                                   | 17(2.453)                                                | 7.04E-09                 |
| rs41267809             | G/A                       | -----                | -0.36 (0.053)                            | -6.76 (1.112)                  | 2.95E-11  | 57.8                                                        | -0.32 (0.088)                                 | -6.37 (1.38)                                       | 1.97E-11              | -0.33(0.055)                                                                  | -5.89(1.145)                                             | 3.20E-09                 |
| rs9295143              | G/C                       | +++++                | 0.17 (0.03)                              | 3.01 (0.558)                   | 8.23E-09  | 0                                                           |                                               |                                                    |                       | 0.18(0.031)                                                                   | -3.09(0.563)                                             | 3.74E-09                 |
| rs41267807             | C/T                       | +----                | -0.29 (0.053)                            | -5.32 (1.035)                  | 3.25E-08  | 82.3                                                        | -0.31 (0.127)                                 | -4.93 (1.548)                                      | 4.02E-10              | -0.34(0.055)                                                                  | -6.43(1.061)                                             | 5.10E-10                 |
| rs182532458            | A/G                       | ?-?+                 | 0.29 (0.08)                              | 3.75 (1.188)                   | 3.04E-04  | 77.8                                                        | 0.16 (0.194)                                  | 0.22 (3.563)                                       | 8.11E-05              | 0.51(0.081)                                                                   | 6.46(1.199)                                              | 3.11E-10                 |
| rs62440901             | T/C                       | +++-                 | 0.05 (0.017)                             | 0.91 (0.337)                   | 4.65E-03  | 71.5                                                        | 0.05 (0.032)                                  | 1.05 (0.55)                                        | 9.10E-04              | 0.14(0.018)                                                                   | 2.6(0.348)                                               | 3.92E-16                 |
| rs3798221              | T/G                       | --++                 | -0.04 (0.016)                            | -1.25 (0.357)                  | 1.06E-02  | 34.1                                                        |                                               |                                                    |                       | -0.23(0.02)                                                                   | -3.53(0.418)                                             | 1.09E-31                 |

... to be continued

Table S8: continued

| SNP                     | Min_allele/<br>Ref_allele | Effect<br>Direction* | Single SNP analysis, fixed effects model |                                |          | Single SNP analysis, heterogeneity and random effects model |                                               |                                                    |                       | Joint SNP analysis, fixed effects model, adjusted for all 31 independent SNPs |                                                          |                          |
|-------------------------|---------------------------|----------------------|------------------------------------------|--------------------------------|----------|-------------------------------------------------------------|-----------------------------------------------|----------------------------------------------------|-----------------------|-------------------------------------------------------------------------------|----------------------------------------------------------|--------------------------|
|                         |                           |                      | $\beta$ (se)<br>INT scale                | $\beta$ (se)<br>original scale | p-value  | I <sup>2</sup>                                              | $\beta_{RE}$ (se <sub>RE</sub> )<br>INT scale | $\beta_{RE}$ (se <sub>RE</sub> )<br>original scale | p-value <sub>RE</sub> | $\beta_{Joint}$ (se <sub>Joint</sub> )<br>INT scale                           | $\beta_{Joint}$ (se <sub>Joint</sub> )<br>original scale | p-value <sub>Joint</sub> |
| <b>APOE gene region</b> |                           |                      |                                          |                                |          |                                                             |                                               |                                                    |                       |                                                                               |                                                          |                          |
| rs7412                  | T/C                       | ?----                | -0.17 (0.029)                            | -2.78 (0.555)                  | 3.48e-09 | 53.9                                                        | -0.16 (0.043)                                 | -2.68 (0.908)                                      | 3.32e-09              |                                                                               |                                                          |                          |

All p-values are based on the inverse-normal transformed Lp(a) values. All effect estimates refer to the minor allele derived from 1000G, phase1v3 (see Supplementary Table 3);

\*Order of included GWA studies: CoLaus, FamHS, KORA F3, KORA F4, YFS. +: positive effect from minor allele on inverse-normal transformed Lp(a) in that specific study, -: inverse effect from minor allele on inverse-normal transformed Lp(a) in that specific study;?: SNP not available in that study

**Table S9: This table reports detailed data for functional elements of table 4.** All SNPs in LD ( $r^2 > 0.8$ ) with each lead SNP of our association study, which is located at any functional element, is reported (LD data according to SNIIPA(17)). For each SNP location transcription factor binding sites (TFBS) detected by ChIP by the ENCODE project, curated functional elements from the ORegAnno(31) database and DNase hypersensitive sites according to ENCODE data are reported. Several SNPs are located in clusters of TFBS, which is visible by annotation of dozens of TFBS to a SNP. Some of these are validated by the ORegAnno(31) database information and by colocation with DNase hypersensitive sites.

| Proxy SNP<br>( $r^2 > 0.8$ ) | Lead SNP<br>(model 1 or 2) | R2   | d'   | MAF    | Located in TFBS element                                                                                               | Located in ORegAnno<br>element | Located in DNase<br>hypersensitive<br>cluster |
|------------------------------|----------------------------|------|------|--------|-----------------------------------------------------------------------------------------------------------------------|--------------------------------|-----------------------------------------------|
| rs2661845                    | rs1018234                  | 0.84 | 0.93 | 0.2813 |                                                                                                                       |                                | yes                                           |
| rs402219                     | rs1018234                  | 0.93 | 0.98 | 0.2843 | CTCF, RAD21                                                                                                           |                                | yes                                           |
| rs1510229                    | rs1018234                  | 0.98 | 1.00 | 0.2734 |                                                                                                                       |                                | yes                                           |
| rs420038                     | rs1018234                  | 0.98 | 1.00 | 0.2724 | POLR2A, CTCF, TCF12, YY1, NR3C1, RCOR1, MAX, CREB1, REST, JUN, MYC, EP300, SMC3, FOS, JUN, FOSL2, CEBPB, STAT3, FOXA2 |                                | yes                                           |
| rs394352                     | rs1018234                  | 0.97 | 0.99 | 0.2734 | EP300, FOSL2, STAT3, FOXA2, CTCF                                                                                      |                                | yes                                           |
| rs112842440                  | rs112842440                | 1.00 | 1.00 | 0.0159 | CTCF                                                                                                                  | OREG0017773 (CTCF)             |                                               |
| rs117016271                  | rs117162385                | 1.00 | 1.00 | 0.0030 |                                                                                                                       |                                | yes                                           |
| rs12204009                   | rs12204009                 | 1.00 | 1.00 | 0.0060 | STAT3                                                                                                                 |                                |                                               |
| rs12529361                   | rs12529361                 | 1.00 | 1.00 | 0.2197 | MYBL2, TEAD4, HNF4 in immediate vicinity ( approx. 70 bases)                                                          |                                |                                               |
| rs139699952                  | rs139699952                | 1.00 | 1.00 | 0.0457 | SRF                                                                                                                   |                                |                                               |
| rs9457927                    | rs140570886                | 0.81 | 0.90 | 0.0099 |                                                                                                                       |                                | yes                                           |
| rs7452960                    | rs140570886                | 0.81 | 0.90 | 0.0099 | POLR2A, E2F1, ELF1, TAF1, MAX, E2F6, PHF8, CCNT2, REST, UBTF, CTCF, GABPA, CTCFL, EGR1, BACH1                         | OREG1390505 (CTCF)             | yes                                           |
| rs141463285                  | rs141463285                | 1.00 | 1.00 | 0.0050 | CEBPB                                                                                                                 |                                |                                               |
| rs41270992                   | rs141550222                | 1.00 | 1.00 | 0.0338 |                                                                                                                       | OREG1390505 (CTCF)             |                                               |
| rs116857939                  | rs143665477                | 1.00 | 1.00 | 0.0099 |                                                                                                                       |                                | yes                                           |
| rs147402310                  | rs147402310                | 1.00 | 1.00 | 0.0020 | ATF2                                                                                                                  |                                |                                               |
| rs149302195                  | rs149302195                | 1.00 | 1.00 | 0.0040 |                                                                                                                       |                                | yes                                           |
| rs150571318                  | rs150571318                | 1.00 | 1.00 | 0.0050 | SETD1, CBX3                                                                                                           |                                |                                               |
| rs9457927                    | rs1510224                  | 1.00 | 1.00 | 0.0099 |                                                                                                                       |                                | yes                                           |
| rs7452960                    | rs1510224                  | 1.00 | 1.00 | 0.0099 | POLR2A, E2F1, ELF1, TAF1, MAX, E2F6, PHF8, CCNT2, REST, UBTF, CTCF, GABPA, CTCFL, EGR1, BACH1                         | OREG1513079 (EGR1)             | yes                                           |

| Proxy SNP<br>( $r^2 > 0.8$ ) | Lead SNP<br>(model 1 or 2) | R2   | d'   | MAF    | Located in TFBS element                                                                                                                 | Located in ORegAnno<br>element | Located in DNase<br>hypersensitive<br>cluster |
|------------------------------|----------------------------|------|------|--------|-----------------------------------------------------------------------------------------------------------------------------------------|--------------------------------|-----------------------------------------------|
| rs60249401                   | rs151181359                | 1.00 | 1.00 | 0.0020 |                                                                                                                                         |                                | yes                                           |
| rs115595521                  | rs151181359                | 1.00 | 1.00 | 0.0020 | USF1                                                                                                                                    |                                | yes                                           |
| rs145355428                  | rs151181359                | 1.00 | 1.00 | 0.0020 |                                                                                                                                         |                                | yes                                           |
| rs116489382                  | rs151181359                | 1.00 | 1.00 | 0.0020 |                                                                                                                                         |                                | yes                                           |
| rs148998205                  | rs151181359                | 1.00 | 1.00 | 0.0020 | TFAP2C, STAT1, POLR2A, RBBP5, MYC, MAX, STAT3, TAF1,<br>FOS, BHLHE40, GABPA                                                             | OREG1875423 (STAT1)            | yes                                           |
| rs149165185                  | rs151181359                | 1.00 | 1.00 | 0.0020 | SETDB1                                                                                                                                  |                                |                                               |
| rs112513709                  | rs151181359                | 1.00 | 1.00 | 0.0020 |                                                                                                                                         |                                | yes                                           |
| rs6923666                    | rs151181359                | 1.00 | 1.00 | 0.0020 | YY1                                                                                                                                     |                                |                                               |
| rs141909377                  | rs151181359                | 1.00 | 1.00 | 0.0020 | REST, EP300, FOXA1, FOXA2                                                                                                               |                                |                                               |
| rs114561156                  | rs151181359                | 1.00 | 1.00 | 0.0020 |                                                                                                                                         |                                | yes                                           |
| rs1510227                    | rs151181359                | 1.00 | 1.00 | 0.0020 | NFIC, JUND, JUN, FOS, EP300, TCF12, TCF7L2, NR3C1,<br>REST, ZBTB33, ETS1, GABPA, ATF3, SIX5, JUNB, FOSL2,<br>ARID3A, BCL3, STAT3, CEBPB | OREG1627348 (FOS)              | yes                                           |
| rs16891557                   | rs151181359                | 1.00 | 1.00 | 0.0020 | POLR2A, YY1, CTCF, RAD21                                                                                                                |                                | yes                                           |
| rs80199309                   | rs151181359                | 1.00 | 1.00 | 0.0020 | TCF12, BATF                                                                                                                             |                                | yes                                           |
| rs116059768                  | rs151181359                | 1.00 | 1.00 | 0.0020 |                                                                                                                                         |                                | yes                                           |
| rs16891631                   | rs151181359                | 1.00 | 1.00 | 0.0020 | CTCF, RAD21, TEAD4                                                                                                                      | OREG1390503 (CTCF)             | yes                                           |
| rs143153993                  | rs151181359                | 1.00 | 1.00 | 0.0020 |                                                                                                                                         |                                | yes                                           |
| rs73593001                   | rs151181359                | 1.00 | 1.00 | 0.0020 |                                                                                                                                         |                                | yes                                           |
| rs138671474                  | rs151181359                | 1.00 | 1.00 | 0.0020 |                                                                                                                                         | OREG0017773 (CTCF)             |                                               |
| rs577585402                  | rs151181359                | 1.00 | 1.00 | 0.0020 | NR2C2                                                                                                                                   |                                |                                               |
| rs41264330                   | rs151181359                | 1.00 | 1.00 | 0.0020 |                                                                                                                                         |                                | yes                                           |
| rs149903141                  | rs151181359                | 1.00 | 1.00 | 0.0020 |                                                                                                                                         |                                | yes                                           |
| rs144967663                  | rs151181359                | 1.00 | 1.00 | 0.0020 |                                                                                                                                         |                                | yes                                           |
| rs144786677                  | rs151181359                | 1.00 | 1.00 | 0.0020 | CTCF                                                                                                                                    |                                | yes                                           |
| rs73782428                   | rs151181359                | 1.00 | 1.00 | 0.0020 | RCOR1                                                                                                                                   |                                | yes                                           |
| rs4252043                    | rs151181359                | 1.00 | 1.00 | 0.0020 |                                                                                                                                         | OREG1577498 (FOXA1)            |                                               |
| rs73782431                   | rs151181359                | 1.00 | 1.00 | 0.0020 | MYBL2                                                                                                                                   |                                |                                               |
| rs117941373                  | rs182532458                | 0.83 | 1.00 | 0.0050 |                                                                                                                                         |                                | yes                                           |

| Proxy SNP<br>( $r^2 > 0.8$ ) | Lead SNP<br>(model 1 or 2) | R2   | d'    | MAF    | Located in TFBS element | Located in ORegAnno<br>element | Located in DNase<br>hypersensitive<br>cluster |
|------------------------------|----------------------------|------|-------|--------|-------------------------|--------------------------------|-----------------------------------------------|
| rs189481237                  | rs182532458                | 0.83 | 1.00  | 0.0050 | POLR2A, WRNIP1          | OREG1265628 (SMARCA4)          |                                               |
| rs182532458                  | rs182532458                | 1.00 | 1.00  | 0.0060 | GATA1                   |                                |                                               |
| rs185653030                  | rs182532458                | 1.00 | 1.00  | 0.0060 |                         |                                | yes                                           |
| rs186696265                  | rs186696265                | 1.00 | 1.00  | 0.0129 |                         |                                | yes                                           |
| rs187270959                  | rs187270959                | 1.00 | 1.00  | 0.0050 |                         |                                | yes                                           |
| rs4709485                    | rs2140650                  | 0.93 | 0.97  | 0.2197 |                         | OREG1265046 (SMARCA5)          |                                               |
| rs1001808                    | rs2140650                  | 0.95 | 0.99  | 0.2207 | POLR2A                  |                                |                                               |
| rs4709488                    | rs2140650                  | 0.94 | 0.98  | 0.2197 | KAP1, GATA2, GATA3      |                                | yes                                           |
| rs410926                     | rs2246531                  | 0.88 | 0.94  | 0.2266 |                         |                                | yes                                           |
| rs2661836                    | rs2246531                  | 0.87 | 0.94  | 0.2276 |                         |                                | yes                                           |
| rs2665354                    | rs2246531                  | 0.88 | 0.94  | 0.2266 |                         |                                | yes                                           |
| rs2665353                    | rs2246531                  | 0.88 | 0.94  | 0.2266 |                         |                                | yes                                           |
| rs2661846                    | rs2246531                  | 0.85 | 0.93  | 0.2316 |                         |                                | yes                                           |
| rs2457557                    | rs2246531                  | 0.86 | 0.93  | 0.2296 |                         |                                | yes                                           |
| rs437865                     | rs2246531                  | 0.88 | 0.94  | 0.2276 | FOS                     |                                | yes                                           |
| rs986666                     | rs2246531                  | 0.97 | 0.99  | 0.2256 | POLR2A                  |                                |                                               |
| rs2246531                    | rs2246531                  | 1.00 | 1.00  | 0.2286 | CEBPB                   | OREG1306811                    |                                               |
| rs2136043                    | rs2246531                  | 0.82 | 0.96  | 0.2097 |                         |                                | yes                                           |
| rs2504925                    | rs2246531                  | 0.83 | 0.97  | 0.2068 |                         | OREG0017771 (CTCF)             |                                               |
| rs3004077                    | rs2457557                  | 0.84 | -0.96 | 0.2147 |                         |                                | yes                                           |
| rs2484241                    | rs2457557                  | 0.87 | -0.99 | 0.2107 |                         |                                | yes                                           |
| rs2504919                    | rs2457557                  | 0.87 | -0.99 | 0.2107 | EZH2                    |                                | yes                                           |
| rs2504918                    | rs2457557                  | 0.87 | -0.99 | 0.2107 |                         |                                | yes                                           |
| rs410926                     | rs2457557                  | 0.98 | 1.00  | 0.2266 |                         |                                | yes                                           |
| rs2661836                    | rs2457557                  | 0.98 | 0.99  | 0.2276 |                         |                                | yes                                           |
| rs2665354                    | rs2457557                  | 0.98 | 1.00  | 0.2266 |                         |                                | yes                                           |
| rs2665353                    | rs2457557                  | 0.98 | 1.00  | 0.2266 |                         |                                | yes                                           |
| rs2661846                    | rs2457557                  | 0.96 | 0.98  | 0.2316 |                         |                                | yes                                           |
| rs2457557                    | rs2457557                  | 1.00 | 1.00  | 0.2296 |                         |                                | yes                                           |

| Proxy SNP<br>( $r^2 > 0.8$ ) | Lead SNP<br>(model 1 or 2) | R2   | d'   | MAF    | Located in TFBS element                                                                                                                                | Located in ORegAnno<br>element                                        | Located in DNase<br>hypersensitive<br>cluster |
|------------------------------|----------------------------|------|------|--------|--------------------------------------------------------------------------------------------------------------------------------------------------------|-----------------------------------------------------------------------|-----------------------------------------------|
| rs437865                     | rs2457557                  | 0.98 | 0.99 | 0.2276 | FOS                                                                                                                                                    |                                                                       | yes                                           |
| rs986666                     | rs2457557                  | 0.89 | 0.95 | 0.2256 | POLR2A                                                                                                                                                 |                                                                       |                                               |
| rs2246531                    | rs2457557                  | 0.86 | 0.93 | 0.2286 | CEBPB                                                                                                                                                  | OREG1306811                                                           |                                               |
| rs2076828                    | rs2457574                  | 1.00 | 1.00 | 0.4344 |                                                                                                                                                        |                                                                       | yes                                           |
| rs2504926                    | rs2457574                  | 0.99 | 1.00 | 0.4354 |                                                                                                                                                        | OREG0017771 (CTCF)                                                    |                                               |
| rs2457564                    | rs2457574                  | 0.95 | 0.98 | 0.4334 |                                                                                                                                                        | OREG0017771 (CTCF)                                                    |                                               |
| rs35358746                   | rs3798221                  | 1.00 | 1.00 | 0.2117 | YY1, MAFK, MAFF, ZBTB7A                                                                                                                                |                                                                       |                                               |
| rs41259144                   | rs41259144                 | 1.00 | 1.00 | 0.0119 |                                                                                                                                                        | OREG1513079 (EGR1)                                                    |                                               |
| rs34126283                   | rs4252109                  | 0.93 | 0.98 | 0.3002 | GATA2                                                                                                                                                  |                                                                       | yes                                           |
| rs4252107                    | rs4252109                  | 1.00 | 1.00 | 0.2932 |                                                                                                                                                        |                                                                       | yes                                           |
| rs4252125                    | rs4252109                  | 0.99 | 1.00 | 0.2962 | CTCF, TEAD4, RUNX3, RAD21                                                                                                                              | OREG1368664 (CTCF)                                                    | yes                                           |
| rs4252126                    | rs4252109                  | 0.99 | 1.00 | 0.2962 | CTCF, TEAD4, RUNX3, RAD21                                                                                                                              |                                                                       |                                               |
| rs4252135                    | rs4252109                  | 0.98 | 1.00 | 0.2972 | CTCF, ZNF143, RELA, RAD21, SMC3, FOXA1, FOXA2,<br>ZNF263                                                                                               | OREG1368665<br>(CTCF), OREG1343765<br>(CTCF)                          | yes                                           |
| rs56093624                   | rs4252109                  | 0.98 | 1.00 | 0.2972 | PML, MTA3, NFATC1, EBF1, CTCF, IKZF1, STAT5A, RUNX3,<br>TCF3, ATF2, RELA, BCL11A, NFIC, TBL1XR1, BCL3, FOXM1                                           |                                                                       | yes                                           |
| rs4252150                    | rs4252109                  | 0.93 | 1.00 | 0.3082 | STAT3, MYC                                                                                                                                             |                                                                       |                                               |
| rs4252151                    | rs4252109                  | 0.93 | 1.00 | 0.3082 | STAT3, MYC                                                                                                                                             |                                                                       |                                               |
| rs9458022                    | rs4252109                  | 0.83 | 0.97 | 0.2694 | ZNF143                                                                                                                                                 |                                                                       |                                               |
| rs56262039                   | rs4252109                  | 0.83 | 0.97 | 0.2684 | SETDB1                                                                                                                                                 |                                                                       |                                               |
| rs520829                     | rs520829                   | 1.00 | 1.00 | 0.4811 |                                                                                                                                                        | OREG1517229 (EGR1)                                                    | yes                                           |
| rs555754                     | rs520829                   | 0.96 | 0.99 | 0.4761 | POLR2A, TBP, YY1, HNF4A, TAF1, EZH2                                                                                                                    | OREG1517229 (EGR1)                                                    | yes                                           |
| rs668871                     | rs520829                   | 0.95 | 0.99 | 0.4742 | POLR2A, EZH2, ZNF263, CHD1, RBBP5, NR3C1, REST, CTCF                                                                                                   | OREG1517229 (EGR1)                                                    | yes                                           |
| rs474513                     | rs520829                   | 0.93 | 0.97 | 0.4831 | POLR2A, EZH2, CHD1, TCF7L2, TAF1, MAX, SIN3AK20,<br>CEBPD, TBP, NFIC, TEAD4, HDAC2, REST, RAD21, ELF1,<br>RXRA, FOXA2, SP1, HNF4A, CEBPB, HNF4G        | OREG1517229<br>(EGR1), OREG1752401<br>(HNF4A), OREG1728897(H<br>NF4A) | yes                                           |
| rs539298                     | rs520829                   | 0.93 | 0.97 | 0.4831 | POLR2A, EZH2, CHD1, TCF7L2, TAF1, MAX, SIN3AK20,<br>CEBPD, TBP, NFIC, TEAD4, HDAC2, REST, RAD21, ELF1,<br>RXRA, FOXA2, SP1, HNF4A, CEBPB, HNF4G, EP300 | OREG1517229<br>(EGR1), OREG1752401<br>(HNF4A), OREG1728897(H          | yes                                           |



| Proxy SNP<br>( $r^2 > 0.8$ ) | Lead SNP<br>(model 1 or 2) | R2   | d'    | MAF    | Located in TFBS element                                                                                                | Located in ORegAnno<br>element                 | Located in DNase<br>hypersensitive<br>cluster |
|------------------------------|----------------------------|------|-------|--------|------------------------------------------------------------------------------------------------------------------------|------------------------------------------------|-----------------------------------------------|
|                              |                            |      |       |        |                                                                                                                        | NF4A)                                          |                                               |
| rs655185                     | rs520829                   | 0.93 | 0.97  | 0.4831 | TCF7L2, NFIC, TEAD4, REST, SP1, HNF4A                                                                                  | OREG1752401<br>(HNF4A), OREG1728897(H<br>NF4A) |                                               |
| rs541091                     | rs520829                   | 0.93 | 0.97  | 0.4831 | TCF7L2, NFIC, TEAD4, REST, SP1, HNF4A                                                                                  | OREG1752401<br>(HNF4A), OREG1728897(H<br>NF4A) | yes                                           |
| rs506823                     | rs520829                   | 0.93 | 0.97  | 0.4841 |                                                                                                                        |                                                | yes                                           |
| rs639426                     | rs520829                   | 0.93 | 0.97  | 0.4831 |                                                                                                                        |                                                | yes                                           |
| rs509707                     | rs520829                   | 0.93 | 0.97  | 0.4831 |                                                                                                                        |                                                | yes                                           |
| rs539958                     | rs520829                   | 0.93 | 0.97  | 0.4831 |                                                                                                                        |                                                | yes                                           |
| rs624319                     | rs520829                   | 0.91 | 0.96  | 0.4811 |                                                                                                                        |                                                | yes                                           |
| rs416879                     | rs520829                   | 0.93 | 0.97  | 0.4831 |                                                                                                                        |                                                | yes                                           |
| rs695174                     | rs520829                   | 0.93 | 0.97  | 0.4831 |                                                                                                                        |                                                | yes                                           |
| rs543159                     | rs520829                   | 0.90 | 0.96  | 0.4781 | POLR2A, FOSL2                                                                                                          |                                                | yes                                           |
| rs675162                     | rs520829                   | 0.92 | 0.97  | 0.4861 | POLR2A, FOSL2, MYC, FOS, STAT3, GABPA, CEBPB, USF1                                                                     | OREG1529878 (ESR1)                             | yes                                           |
| rs9364552                    | rs520829                   | 0.86 | -0.96 | 0.4990 | POLR2A                                                                                                                 |                                                | yes                                           |
| rs6905958                    | rs520829                   | 0.81 | -0.95 | 0.4950 | FOS                                                                                                                    |                                                | yes                                           |
| rs3123634                    | rs520829                   | 0.81 | -0.95 | 0.4950 | CTCF                                                                                                                   |                                                |                                               |
|                              |                            |      |       |        | POLR2A, CTCF, TCF12, YY1, NR3C1, RCOR1, MAX, CREB1,<br>REST, JUNBD, MYC, EP300, RAD21, SMC3, FOS, JUN,<br>FOSL2, CEBPB |                                                | yes                                           |
| rs2313453                    | rs520829                   | 0.81 | -0.94 | 0.4960 |                                                                                                                        |                                                | yes                                           |
| rs2136676                    | rs520829                   | 0.81 | -0.94 | 0.4960 | TCF12, EP300, FOSL2, FOXA2, CTCF                                                                                       |                                                | yes                                           |
| rs3105748                    | rs520829                   | 0.81 | -0.94 | 0.4960 |                                                                                                                        |                                                | yes                                           |
| rs4709426                    | rs520829                   | 0.81 | -0.94 | 0.4970 | POLR2A                                                                                                                 |                                                |                                               |
| rs56393506                   | rs56393506                 | 1.00 | 1.00  | 0.1819 | KAP1, CTCF                                                                                                             |                                                |                                               |
| rs34126283                   | rs59614420                 | 0.94 | 0.98  | 0.3002 | GATA2                                                                                                                  |                                                | yes                                           |
| rs4252107                    | rs59614420                 | 0.99 | 1.00  | 0.2932 |                                                                                                                        |                                                | yes                                           |
| rs4252125                    | rs59614420                 | 0.97 | 0.99  | 0.2962 | CTCF, TEAD4, RUNX3, RAD21                                                                                              | OREG1368664 (CTCF)                             | yes                                           |
| rs4252126                    | rs59614420                 | 0.97 | 0.99  | 0.2962 | CTCF, TEAD4, RUNX3, RAD21                                                                                              |                                                |                                               |
| rs4252135                    | rs59614420                 | 0.97 | 0.99  | 0.2972 | CTCF, ZNF143, RELA, RAD21, SMC3, FOXA1, FOXA2,                                                                         | OREG1368665                                    | yes                                           |

| Proxy SNP<br>( $r^2 > 0.8$ ) | Lead SNP<br>(model 1 or 2) | R2   | d'   | MAF    | Located in TFBS element                                                                                                                 | Located in ORegAnno<br>element | Located in DNase<br>hypersensitive<br>cluster |
|------------------------------|----------------------------|------|------|--------|-----------------------------------------------------------------------------------------------------------------------------------------|--------------------------------|-----------------------------------------------|
|                              |                            |      |      |        | ZNF263                                                                                                                                  | (CTCF),OREG1343765<br>(CTCF)   |                                               |
| rs56093624                   | rs59614420                 | 0.97 | 0.99 | 0.2972 | PML, MTA3, NFATC1, EBF1, CTCF, IKZF1, STAT5A, RUNX3,<br>TCF3, ATF2, RELA, BCL11A, NFIC, TBL1XR1, BCL3, FOXM1                            |                                | yes                                           |
| rs4252150                    | rs59614420                 | 0.94 | 1.00 | 0.3082 | STAT3, MYC                                                                                                                              |                                |                                               |
| rs4252151                    | rs59614420                 | 0.94 | 1.00 | 0.3082 | STAT3, MYC                                                                                                                              |                                |                                               |
| rs9458022                    | rs59614420                 | 0.82 | 0.97 | 0.2694 | ZNF143                                                                                                                                  |                                |                                               |
| rs56262039                   | rs59614420                 | 0.82 | 0.97 | 0.2684 | SETDB1                                                                                                                                  |                                |                                               |
| rs614754                     | rs614754                   | 1.00 | 1.00 | 0.0159 |                                                                                                                                         |                                | yes                                           |
| rs60249401                   | rs6902316                  | 1.00 | 1.00 | 0.0020 |                                                                                                                                         |                                | yes                                           |
| rs115595521                  | rs6902316                  | 1.00 | 1.00 | 0.0020 | USF1                                                                                                                                    |                                | yes                                           |
| rs145355428                  | rs6902316                  | 1.00 | 1.00 | 0.0020 |                                                                                                                                         |                                | yes                                           |
| rs116489382                  | rs6902316                  | 1.00 | 1.00 | 0.0020 |                                                                                                                                         |                                | yes                                           |
| rs148998205                  | rs6902316                  | 1.00 | 1.00 | 0.0020 | TFAP2C, STAT1, POLR2A, RBBP5, MYC, MAX, STAT3, TAF1,<br>FOS, BHLHE40, GABPA                                                             | OREG1875423 (STAT1)            | yes                                           |
| rs149165185                  | rs6902316                  | 1.00 | 1.00 | 0.0020 | SETDB1                                                                                                                                  |                                |                                               |
| rs112513709                  | rs6902316                  | 1.00 | 1.00 | 0.0020 |                                                                                                                                         |                                | yes                                           |
| rs6923666                    | rs6902316                  | 1.00 | 1.00 | 0.0020 | YY1                                                                                                                                     |                                |                                               |
| rs141909377                  | rs6902316                  | 1.00 | 1.00 | 0.0020 | REST, EP300, FOXA1, FOXA2                                                                                                               |                                |                                               |
| rs114561156                  | rs6902316                  | 1.00 | 1.00 | 0.0020 |                                                                                                                                         |                                | yes                                           |
| rs1510227                    | rs6902316                  | 1.00 | 1.00 | 0.0020 | NFIC, JUND, JUN, FOS, EP300, TCF12, TCF7L2, NR3C1,<br>REST, ZBTB33, ETS1, GABPA, ATF3, SIX5, JUNB, FOSL2,<br>ARID3A, BCL3, STAT3, CEBPB | OREG1627348 (FOS)              | yes                                           |
| rs16891557                   | rs6902316                  | 1.00 | 1.00 | 0.0020 | POLR2A, YY1, CTCF, RAD21                                                                                                                |                                | yes                                           |
| rs80199309                   | rs6902316                  | 1.00 | 1.00 | 0.0020 | TCF12, BATF                                                                                                                             |                                | yes                                           |
| rs116059768                  | rs6902316                  | 1.00 | 1.00 | 0.0020 |                                                                                                                                         |                                | yes                                           |
| rs16891631                   | rs6902316                  | 1.00 | 1.00 | 0.0020 | CTCF, RAD21, TEAD4                                                                                                                      | OREG1390503 (CTCF)             | yes                                           |
| rs143153993                  | rs6902316                  | 1.00 | 1.00 | 0.0020 |                                                                                                                                         |                                | yes                                           |
| rs73593001                   | rs6902316                  | 1.00 | 1.00 | 0.0020 |                                                                                                                                         |                                | yes                                           |
| rs138671474                  | rs6902316                  | 1.00 | 1.00 | 0.0020 |                                                                                                                                         | OREG0017773 (CTCF)             |                                               |
| rs577585402                  | rs6902316                  | 1.00 | 1.00 | 0.0020 | NR2C2                                                                                                                                   |                                |                                               |

| Proxy SNP<br>( $r^2 > 0.8$ ) | Lead SNP<br>(model 1 or 2) | R2   | d'   | MAF    | Located in TFBS element                                                                                                                                                                                | Located in ORegAnno<br>element | Located in DNase<br>hypersensitive<br>cluster |
|------------------------------|----------------------------|------|------|--------|--------------------------------------------------------------------------------------------------------------------------------------------------------------------------------------------------------|--------------------------------|-----------------------------------------------|
| rs41264330                   | rs6902316                  | 1.00 | 1.00 | 0.0020 |                                                                                                                                                                                                        |                                | yes                                           |
| rs149903141                  | rs6902316                  | 1.00 | 1.00 | 0.0020 |                                                                                                                                                                                                        |                                | yes                                           |
| rs144967663                  | rs6902316                  | 1.00 | 1.00 | 0.0020 |                                                                                                                                                                                                        |                                | yes                                           |
| rs144786677                  | rs6902316                  | 1.00 | 1.00 | 0.0020 | CTCF                                                                                                                                                                                                   |                                | yes                                           |
| rs73782428                   | rs6902316                  | 1.00 | 1.00 | 0.0020 | RCOR1                                                                                                                                                                                                  |                                | yes                                           |
| rs4252043                    | rs6902316                  | 1.00 | 1.00 | 0.0020 |                                                                                                                                                                                                        | OREG1577498 (FOXA1)            |                                               |
| rs73782431                   | rs6902316                  | 1.00 | 1.00 | 0.0020 | MYBL2                                                                                                                                                                                                  |                                |                                               |
| rs75234242                   | rs75234242                 | 1.00 | 1.00 | 0.0348 | MAFK, MAFF                                                                                                                                                                                             |                                |                                               |
| rs41272050                   | rs75692336                 | 0.84 | 0.97 | 0.1491 | MAFK, MAFF                                                                                                                                                                                             |                                |                                               |
| rs138874197                  | rs75692336                 | 0.95 | 1.00 | 0.1282 |                                                                                                                                                                                                        |                                | yes                                           |
| rs111657849                  | rs75692336                 | 0.96 | 0.98 | 0.1332 |                                                                                                                                                                                                        |                                | yes                                           |
|                              |                            |      |      |        | no TFBS detected in ENCODE, but SNP is located in the<br>cAMP response region, which mediates Lp(a) lowering<br>effects of niacin as described by Chennamsetty et al.(40),<br>2012                     |                                |                                               |
| rs17557261                   | rs75692336                 | 0.97 | 0.98 | 0.1342 |                                                                                                                                                                                                        |                                |                                               |
| rs3106164                    | rs7769879                  | 0.94 | 0.99 | 0.3410 |                                                                                                                                                                                                        |                                | yes                                           |
| rs388170                     | rs7769879                  | 0.94 | 0.99 | 0.3410 | MAX, USF1, USF2                                                                                                                                                                                        |                                |                                               |
| rs1810126                    | rs7769879                  | 1.00 | 1.00 | 0.3529 | REST                                                                                                                                                                                                   |                                |                                               |
| rs3106162                    | rs7769879                  | 0.98 | 1.00 | 0.3569 |                                                                                                                                                                                                        | OREG1221620(SMARCA4)           | yes                                           |
| rs10755578                   | rs9365169                  | 0.92 | 1.00 | 0.4920 |                                                                                                                                                                                                        |                                | yes                                           |
| rs66801308                   | rs9457778                  | 0.82 | 0.98 | 0.2475 | JUND                                                                                                                                                                                                   |                                | yes                                           |
| rs9365116                    | rs9457778                  | 0.82 | 0.98 | 0.2475 | ZNF274                                                                                                                                                                                                 |                                |                                               |
|                              |                            |      |      |        | MTA3, IKZF1, NFATC1, ELA, BCL3, MAX, FOXM1, TBP,<br>EP300, SP1, POU2F2, JUND, CHD2, MAZ, TBL1XR1, NFIC,<br>STAT3, MXI1, ATF2, PAX5, BATF, RUNX3, IRF4, MEF2A,<br>TCF12, EBF1, SMC3, ELK1, PSI1, BCL11A |                                | yes                                           |
| rs12665079                   | rs9457778                  | 0.83 | 0.99 | 0.2495 |                                                                                                                                                                                                        |                                |                                               |
|                              |                            |      |      |        | MTA3, IKZF1, NFATC1, ELA, BCL3, MAX, FOXM1, TBP,<br>EP300, SP1, POU2F2, JUND, CHD2, MAZ, TBL1XR1, NFIC,<br>STAT3, MXI1, ATF2, PAX5, BATF, RUNX3, IRF4, MEF2A,<br>TCF12, EBF1, SMC3, ELK1, PSI1, BCL11A |                                | yes                                           |
| rs7767641                    | rs9457778                  | 0.83 | 0.99 | 0.2495 |                                                                                                                                                                                                        |                                | yes                                           |
| rs9457777                    | rs9457778                  | 0.83 | 0.99 | 0.2495 |                                                                                                                                                                                                        |                                | yes                                           |

| Proxy SNP<br>( $r^2 > 0.8$ ) | Lead SNP<br>(model 1 or 2) | R2   | d'   | MAF    | Located in TFBS element    | Located in ORegAnno<br>element | Located in DNase<br>hypersensitive<br>cluster |
|------------------------------|----------------------------|------|------|--------|----------------------------|--------------------------------|-----------------------------------------------|
| rs4709386                    | rs9457778                  | 0.84 | 1.00 | 0.2495 | GATA2                      |                                | yes                                           |
| rs9456480                    | rs9457778                  | 0.84 | 1.00 | 0.2495 | JUND                       |                                | yes                                           |
| rs1159875                    | rs9457778                  | 0.84 | 1.00 | 0.2495 | CEPBP                      | OREG1522389 (ESR1)             | yes                                           |
| rs9457785                    | rs9457778                  | 0.84 | 1.00 | 0.2495 | SETDB1                     |                                |                                               |
| rs9457786                    | rs9457778                  | 0.84 | 1.00 | 0.2495 | SETDB1                     |                                |                                               |
| rs6901166                    | rs9457778                  | 0.84 | 1.00 | 0.2495 |                            |                                | yes                                           |
| rs7749516                    | rs9457778                  | 0.84 | 1.00 | 0.2495 | MAFK                       |                                |                                               |
| rs1001357                    | rs9457778                  | 0.84 | 1.00 | 0.2505 | EBF1                       |                                | yes                                           |
| rs9456483                    | rs9457778                  | 0.84 | 1.00 | 0.2495 | MYC, MAX, USF1, MAFF, MAFK |                                | yes                                           |
| rs4252045                    | rs9458010                  | 0.80 | 0.97 | 0.4831 |                            | OREG1577498 (FOXA1)            |                                               |
| rs2314851                    | rs9458010                  | 0.81 | 0.98 | 0.4851 | FOXA1                      |                                |                                               |

**Table S10:** Results of the hypothesis-free genome-wide gene-based analysis sorted by p-value of model 1. Only significant genes are reported (significance level  $1.99 \times 10^{-6}$ ).

| Gene                | Chr | Gene-based p-value based on        |                                              |
|---------------------|-----|------------------------------------|----------------------------------------------|
|                     |     | Model 1<br>(adjusted for age, sex) | Model 2<br>(adjusted for age, sex, isoforms) |
| <i>LPA</i>          | 6   | < 1E-300                           | 3.27E-227                                    |
| <i>PLG</i>          | 6   | 1.53E-231                          | 2.79E-218                                    |
| <i>LPAL2</i>        | 6   | 1.1E-168                           | 1.77E-175                                    |
| <i>SLC22A3</i>      | 6   | 2.78E-151                          | 3.53E-171                                    |
| <i>SLC22A2</i>      | 6   | 2.36E-102                          | 3.97E-104                                    |
| <i>MAP3K4</i>       | 6   | 2.29E-91                           | 2.92E-92                                     |
| <i>SLC22A1</i>      | 6   | 2.06E-74                           | 3.18E-69                                     |
| <i>LOC729603</i>    | 6   | 5.62E-51                           | 1.40E-49                                     |
| <i>IGF2R</i>        | 6   | 3.29E-50                           | 1.63E-48                                     |
| <i>AGPAT4</i>       | 6   | 1.73E-48                           | 6.13E-51                                     |
| <i>AIRN</i>         | 6   | 3.11E-30                           | 2.39E-29                                     |
| <i>AGPAT4-IT1</i>   | 6   | 3.63E-22                           | 5.49E-17                                     |
| <i>PNLDC1</i>       | 6   | 1.24E-19                           | 5.09E-22                                     |
| <i>MAS1</i>         | 6   | 2.75E-09                           | 8.51E-07                                     |
| <i>SOD2</i>         | 6   | 1.51E-08                           |                                              |
| <i>PVRL2</i>        | 19  | 1.69E-08                           | 1.40E-07                                     |
| <i>APOC1</i>        | 19  | 1.76E-08                           | 2.00E-07                                     |
| <i>TOMM40</i>       | 19  | 2.81E-08                           | 2.67E-07                                     |
| <i>LOC100129518</i> | 6   | 2.83E-08                           |                                              |
| <i>APOE</i>         | 19  | 2.98E-08                           | 2.87E-07                                     |
| <i>ACAT2</i>        | 6   | 3.15E-08                           |                                              |
| <i>APOC1P1</i>      | 19  | 3.31E-08                           | 3.52E-07                                     |
| <i>WTAP</i>         | 6   | 3.44E-08                           |                                              |
| <i>PARK2</i>        | 6   |                                    | 1.32E-08                                     |

**Table S11:** Results of the gene-based candidate gene analysis sorted by p-value of model 1. Results for all 21 evaluated candidate genes are reported (significance level  $0.05/21=0.0024$ ).

| Gene   | Chr | Gene-based p-value based on        |                                              |
|--------|-----|------------------------------------|----------------------------------------------|
|        |     | Model 1<br>(adjusted for age, sex) | Model 2<br>(adjusted for age, sex, isoforms) |
| TLR2   | 4   | 0.00034                            | 0.03226                                      |
| PCSK9  | 1   | 0.06972                            | 0.53516                                      |
| LRP8   | 1   | 0.09064                            | 0.93752                                      |
| SREBF2 | 22  | 0.13063                            | 0.30127                                      |
| HNF1a  | 12  | 0.1405                             | 0.35703                                      |
| TLR4   | 9   | 0.15779                            | 0.32374                                      |
| FGFR4  | 5   | 0.21134                            | 0.83208                                      |
| ANXA2  | 15  | 0.56234                            | 0.4203                                       |
| LDLR   | 19  | 0.7646                             | 0.82673                                      |
| TLR6   | 4   | 0.78469                            | 0.26427                                      |
| LGALS1 | 22  | 0.80678                            | 0.52011                                      |
| CD36   | 7   | 0.86773                            | 0.94173                                      |
| IL6    | 7   | 0.86789                            | 0.78302                                      |
| FBLN5  | 14  | 0.87591                            | 0.95648                                      |
| SREBF1 | 17  | 0.91322                            | 0.39603                                      |
| LRP2   | 2   | 0.91866                            | 0.46836                                      |
| FGF19  | 11  | 0.96328                            | 0.94088                                      |
| SCARB1 | 12  | 0.96432                            | 0.87328                                      |
| NR1H4  | 12  | 0.97445                            | 0.80344                                      |
| LRP1   | 12  | 0.99222                            | 0.94894                                      |
| VLDLR  | 9   | 0.99482                            | 0.98335                                      |

**Table S12:** Overview on studies that investigated an association of the apolipoprotein E polymorphism with Lp(a) concentrations.

| Reference                         | Study type                                               | Sample size                                                      | Finding                                                                                                                                                                        |
|-----------------------------------|----------------------------------------------------------|------------------------------------------------------------------|--------------------------------------------------------------------------------------------------------------------------------------------------------------------------------|
| de Knijff et al. (1991) (41)      | Cross-sectional                                          | 303 healthy persons                                              | E2 decreased Lp(a) by 25% and E4 increased Lp(a) by 26%                                                                                                                        |
| Muls et al. (1993) (42)           | Case study                                               | 54 normolipidemic obese women                                    | No association                                                                                                                                                                 |
| Horita et al. (1993) (43)         | Cross-sectional                                          | 305 civil service workers                                        | <i>APOE2</i> was associated with significantly lower Lp(a) in women (tendency to lower levels in men)                                                                          |
| Schaefer et al. (1994) (44)       | Population-based cohort                                  | 2258 men and women of the Framingham Offspring Study             | No association                                                                                                                                                                 |
| Tiret et al. (1994) (45)          | Family-based study                                       | Offsprings of 635 MI cases and 1259 controls                     | Carriers of <i>APOE2</i> had lower Lp(a) levels                                                                                                                                |
| Lindahl et al. (1994) (46)        | Patients with familial hypercholesterolemia (FH)         | 149 patients with heterozygous FH                                | <i>APOE2</i> associated with lower Lp(a) levels                                                                                                                                |
| Heng et al. (1995) (47)           | Cross-sectional                                          | 536 healthy Chinese in Singapore                                 | No significant effect of <i>APOE</i> polymorphism                                                                                                                              |
| Muros et al. (1996) (48)          | Cross-sectional                                          | 397 individuals of a Spanish working population of Tenerife      | No association                                                                                                                                                                 |
| Klausen et al. (1996) (49)        | Population-based general population                      | 466 white men with different apo(a) phenotypes                   | No overall effect. In apo(a) S4 isoforms Lp(a) was highest in <i>APOE</i> E3/E4. In apo(a) S2 isoforms Lp(a) was lowest in <i>APOE</i> E2/E3 genotypes.                        |
| Boomsma et al. (2000) (50)        | Family Study                                             | 142 Dutch families                                               | <i>APOE</i> did not contribute to Lp(a) variation                                                                                                                              |
| Frikke-Schmidt et al. (2000) (51) | Population-based general population                      | 5,025 women and 4,035 men from the Copenhagen City Heart Study   | Lower Lp(a) levels in <i>APOE2</i> carriers in women only, but not in men                                                                                                      |
| Anuurad et al. (2007) (52)        | Patients scheduled for diagnostic coronary arteriography | 231 African Americans and 336 Caucasians                         | No association in Caucasians. In African Americans Lp(a) was lower in <i>APOE2</i> carriers especially in case of large apo(a) isoforms                                        |
| Li et al. (2015) (53)             | Genome-wide association study                            | 2895 African Americans of the Jackson Heart Study                | single nonsynonymous SNP in <i>APOE</i> significantly associated with Lp(a)                                                                                                    |
| Moriarty et al. (2017) (54)       | Cross-sectional                                          | 431,239 patients with laboratory testing as part of routine care | Mean Lp(a) levels were 65% higher in <i>APOE</i> E4/E4 compared with <i>APOE</i> E2/E2 and increased according to <i>APOE</i> genotype (E2/E2 < E2/E3 < E3/E3 < E3/E4 < E4/E4) |

**Table S13:** Association results with inverse normal transformed Lp(a) levels as well as CAD risk (derived from the CARDIoGRAMplusC4D consortium) of all 40 SNPs, which were identified in model 1 (age- and sex-adjusted) and which were available in the CARDIoGRAMplusC4D results. Effect estimates and Odds Ratios refer to the minor allele. All SNPs, which are also genome-wide significantly associated with CAD risk are marked in bold. SNPs are sorted by CAD risk p-value.

| SNP                   | Minor/<br>Major allele | Association with inverse normal<br>transformed Lp(a) levels |                               |           | Association with CAD risk (derived<br>from CARDIoGRAMplusC4D<br>consortium) |                               |                 |
|-----------------------|------------------------|-------------------------------------------------------------|-------------------------------|-----------|-----------------------------------------------------------------------------|-------------------------------|-----------------|
|                       |                        | $\beta$                                                     | 95%<br>Confidence<br>Interval | p-value   | Odds<br>Ratio                                                               | 95%<br>Confidence<br>Interval | p-value         |
| <b>rs118039278</b>    | A/G                    | 1.22                                                        | [1.16, 1.28]                  | 1.36e-396 | 1.36                                                                        | [1.29, 1.42]                  | <b>4.38E-37</b> |
| <b>rs4252185</b>      | C/T                    | 0.92                                                        | [0.86, 0.98]                  | 5.31E-211 | 1.34                                                                        | [1.28, 1.41]                  | <b>1.64E-32</b> |
| <b>rs186696265</b>    | T/C                    | 2.02                                                        | [1.90, 2.14]                  | 4.15E-231 | 1.73                                                                        | [1.58, 1.91]                  | <b>3.35E-30</b> |
| <b>rs56393506</b>     | T/C                    | 0.68                                                        | [0.64, 0.72]                  | 7.76E-285 | 1.16                                                                        | [1.13, 1.19]                  | <b>2.37E-25</b> |
| <b>rs7412 (APOE2)</b> | T/C                    | -0.19                                                       | [-0.25, -0.13]                | 3.47E-10  | 0.87                                                                        | [0.84, 0.91]                  | <b>8.17E-11</b> |
| <b>rs7770628</b>      | C/T                    | 0.18                                                        | [0.16, 0.20]                  | 4.80E-45  | 1.06                                                                        | [1.04, 1.08]                  | <b>7.52E-09</b> |
| <b>rs1510224</b>      | C/T                    | 1.35                                                        | [1.25, 1.45]                  | 4.27E-160 | 1.40                                                                        | [1.25, 1.57]                  | <b>8.22E-09</b> |
| rs4252198             | G/C                    | 1.15                                                        | [1.03, 1.27]                  | 2.72E-84  | 1.27                                                                        | [1.16, 1.39]                  | 3.58E-07        |
| rs9458010             | C/T                    | 0.09                                                        | [0.06, 0.12]                  | 4.11E-12  | 1.05                                                                        | [1.03, 1.08]                  | 2.30E-06        |
| rs41269133            | C/T                    | -0.33                                                       | [-0.37, -0.29]                | 5.42E-55  | 0.93                                                                        | [0.90, 0.96]                  | 4.29E-06        |
| rs184278183           | T/C                    | 0.95                                                        | [0.80, 1.10]                  | 9.36E-34  | 1.28                                                                        | [1.15, 1.43]                  | 9.71E-06        |
| rs520829              | G/T                    | -0.14                                                       | [-0.16, -0.12]                | 2.65E-29  | 0.96                                                                        | [0.95, 0.98]                  | 5.82E-05        |
| rs2457574             | A/G                    | -0.21                                                       | [-0.23, -0.19]                | 2.77E-63  | 0.96                                                                        | [0.95, 0.98]                  | 7.54E-05        |
| rs78439586            | A/G                    | -0.42                                                       | [-0.48, -0.36]                | 1.28E-47  | 0.91                                                                        | [0.86, 0.95]                  | 7.73E-05        |
| rs73596816            | A/G                    | 0.66                                                        | [0.51, 0.81]                  | 1.53E-18  | 1.14                                                                        | [1.06, 1.21]                  | 0.0002          |
| rs1018234             | T/C                    | -0.12                                                       | [-0.15, -0.09]                | 6.30E-16  | 0.97                                                                        | [0.95, 0.99]                  | 0.0005          |
| rs141550222           | G/C                    | -0.54                                                       | [-0.62, -0.46]                | 6.73E-44  | 0.89                                                                        | [0.84, 0.95]                  | 0.0009          |
| rs4252109             | G/T                    | -0.29                                                       | [-0.32, -0.26]                | 4.86E-105 | 0.97                                                                        | [0.95, 0.99]                  | 0.0023          |
| rs6902316             | G/A                    | 0.74                                                        | [0.61, 0.87]                  | 4.30E-29  | 1.13                                                                        | [1.04, 1.22]                  | 0.0041          |
| rs12529361            | C/T                    | 0.30                                                        | [0.27, 0.33]                  | 5.57E-69  | 1.04                                                                        | [1.01, 1.07]                  | 0.0051          |
| rs6938647             | A/C                    | -0.37                                                       | [-0.4, -0.34]                 | 7.48E-119 | 0.96                                                                        | [0.94, 0.99]                  | 0.0079          |
| rs62440901            | T/C                    | 0.14                                                        | [0.10, 0.18]                  | 3.11E-14  | 1.03                                                                        | [1.01, 1.06]                  | 0.0093          |
| rs41272114            | T/C                    | -0.78                                                       | [-0.86, -0.7]                 | 4.74E-86  | 0.93                                                                        | [0.88, 0.99]                  | 0.0204          |
| rs147402310           | G/T                    | -0.63                                                       | [-0.74, -0.52]                | 8.97E-32  | 0.91                                                                        | [0.84, 0.99]                  | 0.0225          |
| rs614754              | C/G                    | 0.72                                                        | [0.54, 0.90]                  | 1.43E-15  | 1.15                                                                        | [1.02, 1.29]                  | 0.0243          |
| rs185934663           | G/T                    | -0.81                                                       | [-0.99, -0.63]                | 4.58E-18  | 0.86                                                                        | [0.74, 1.00]                  | 0.0484          |
| rs2489940             | T/G                    | -0.75                                                       | [-0.87, -0.63]                | 1.67E-32  | 0.91                                                                        | [0.83, 1.01]                  | 0.0709          |
| rs142126734           | A/G                    | 0.44                                                        | [0.38, 0.50]                  | 8.52E-48  | 1.05                                                                        | [1.00, 1.10]                  | 0.0762          |
| rs76000021            | C/T                    | -0.41                                                       | [-0.52, -0.30]                | 4.70E-13  | 0.93                                                                        | [0.85, 1.01]                  | 0.0901          |
| rs6903649             | C/T                    | -0.20                                                       | [-0.23, -0.17]                | 3.91E-45  | 0.98                                                                        | [0.96, 1.00]                  | 0.1055          |
| rs62441903            | G/A                    | -0.82                                                       | [-0.96, -0.68]                | 4.86E-33  | 0.93                                                                        | [0.85, 1.02]                  | 0.1433          |
| rs2140650             | G/A                    | 0.05                                                        | [0.02, 0.08]                  | 1.10E-03  | 1.01                                                                        | [0.99, 1.03]                  | 0.2658          |
| rs41259144            | T/C                    | -0.85                                                       | [-1.01, -0.69]                | 4.45E-24  | 0.93                                                                        | [0.79, 1.09]                  | 0.3877          |
| rs79246098            | C/T                    | 0.28                                                        | [0.14, 0.42]                  | 7.53E-05  | 1.04                                                                        | [0.93, 1.16]                  | 0.4800          |
| rs139699952           | C/G                    | 0.37                                                        | [0.26, 0.48]                  | 4.70E-11  | 1.02                                                                        | [0.95, 1.11]                  | 0.5414          |
| rs2457557             | T/C                    | -0.05                                                       | [-0.08, -0.02]                | 5.60E-04  | 0.99                                                                        | [0.97, 1.02]                  | 0.5628          |
| rs143520616           | T/G                    | 0.27                                                        | [0.17, 0.37]                  | 5.01E-08  | 0.99                                                                        | [0.93, 1.06]                  | 0.7435          |
| rs2246531             | G/A                    | 0.00                                                        | [-0.03, 0.03]                 | 8.48E-01  | 1.00                                                                        | [0.98, 1.03]                  | 0.9167          |
| rs12664092            | C/A                    | 0.20                                                        | [0.13, 0.27]                  | 1.92E-07  | 1.00                                                                        | [0.95, 1.06]                  | 0.9358          |
| rs9457778             | T/C                    | -0.05                                                       | [-0.08, -0.02]                | 8.75E-04  | 1.00                                                                        | [0.98, 1.02]                  | 0.9413          |



Supplementary Figures

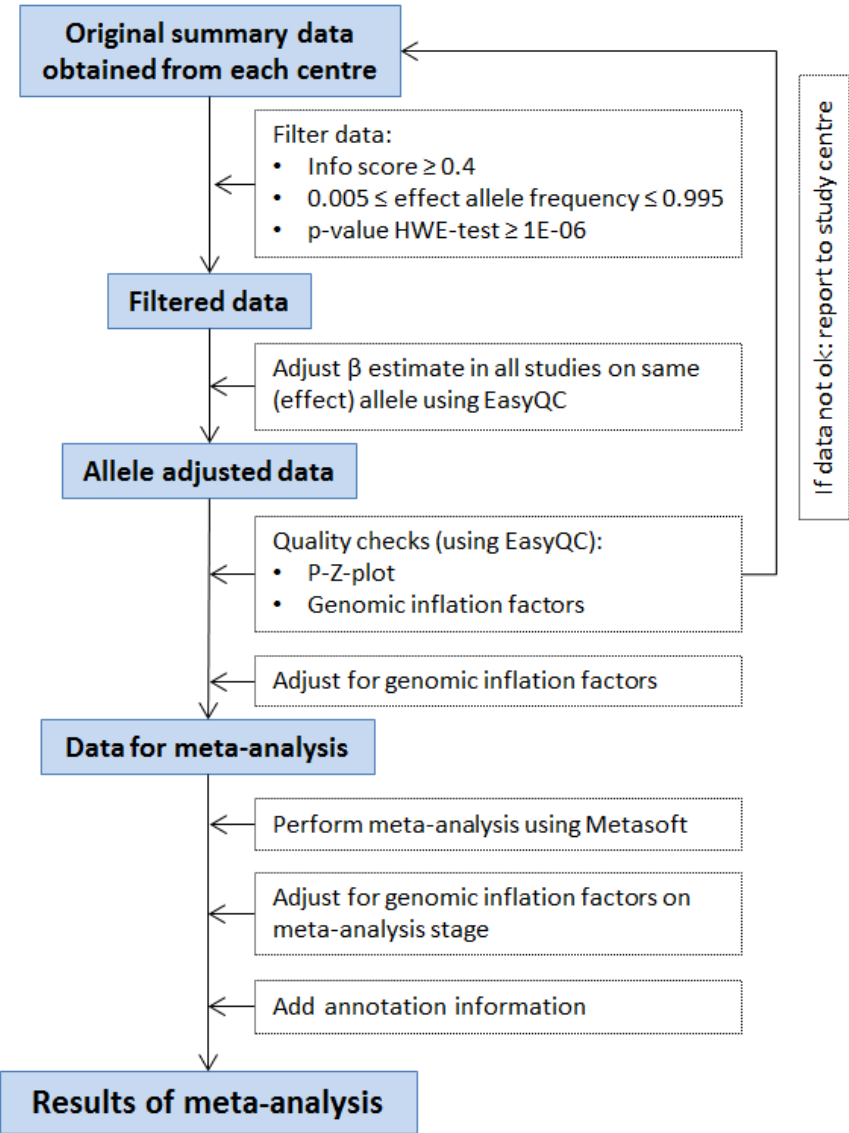

Figure S1: Quality control and meta-analysis workflow.

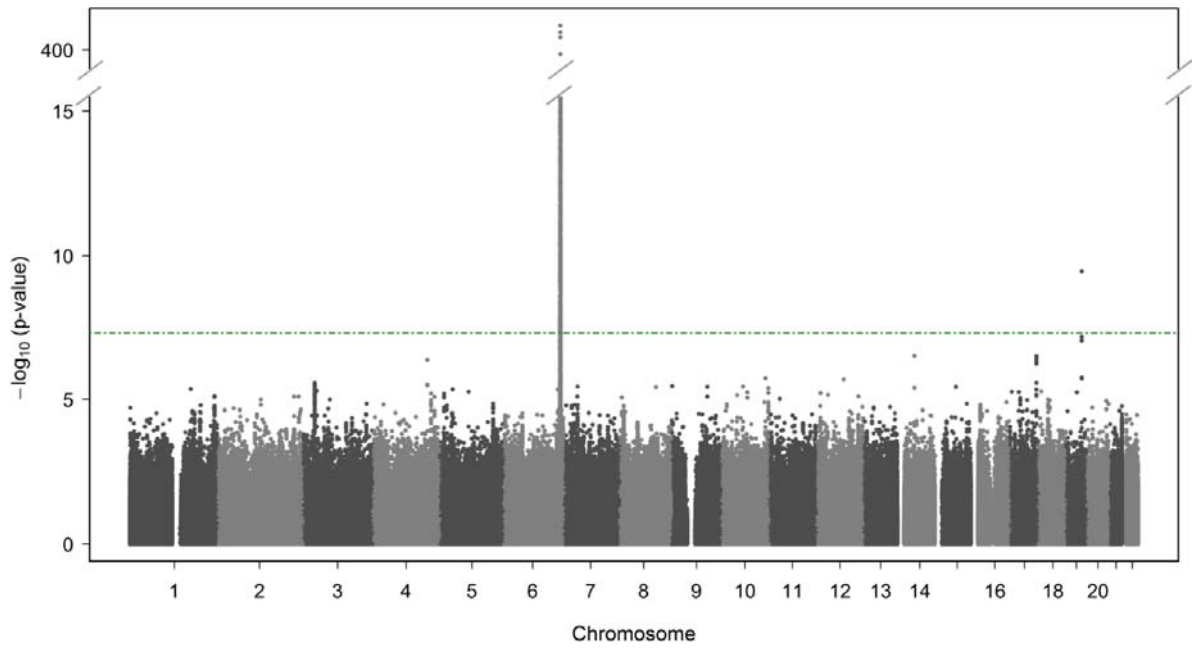

**Figure S2:** Manhattan-plot for the meta-analysis on inverse-normal transformed Lp(a) values, adjusted for age and sex. Results are based on five cohorts including 13,781 individuals. The y-axis is broken to display all relevant results.

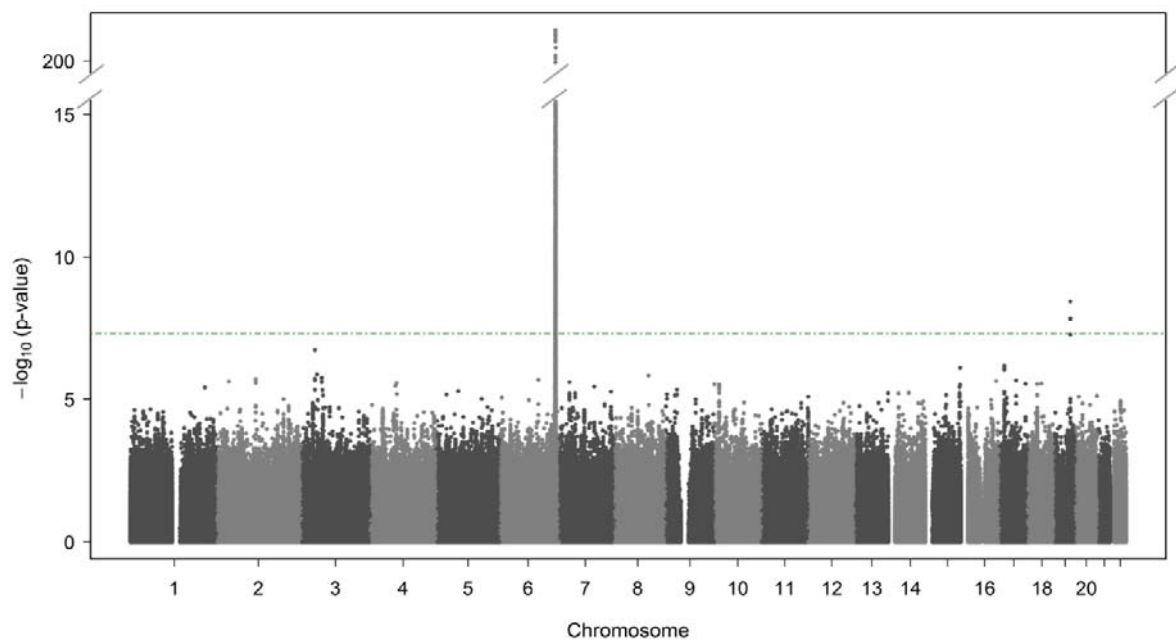

**Figure S3:** Manhattan-plot for the meta-analysis on inverse-normal transformed Lp(a) values, adjusted for age, sex and the predominantly expressed apo(a) isoform. Results are based on five cohorts including 13,781 individuals. The y-axis is broken to display all relevant results.

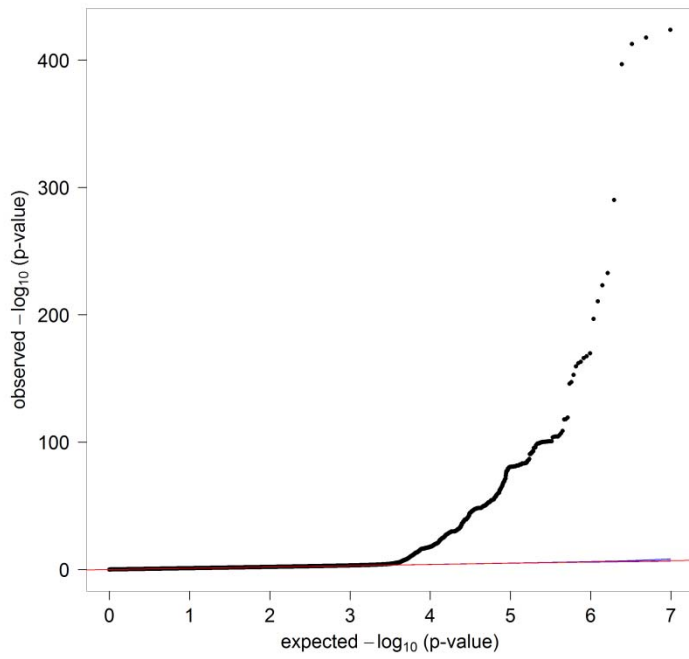

**Figure S4:** QQ-plot for the meta-analysis on inverse-normal transformed Lp(a) values adjusted for age and sex.

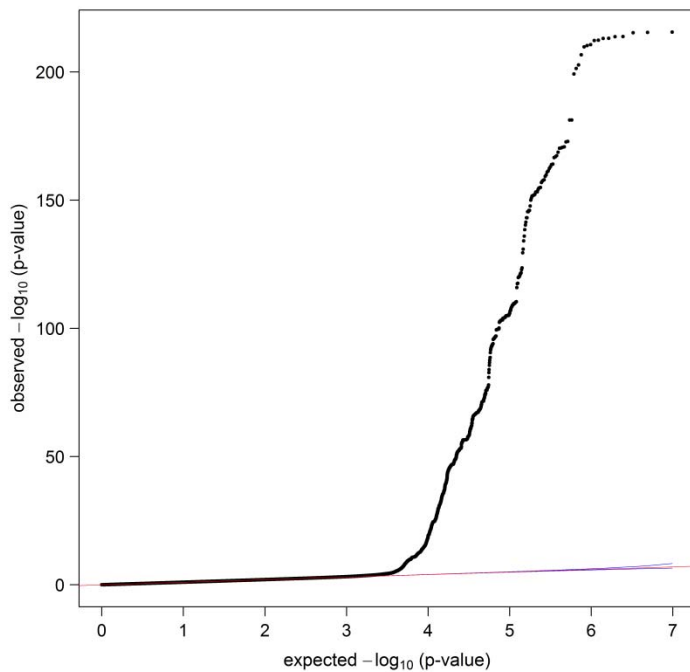

**Figure S5:** QQ-plot for the meta-analysis on inverse-normal transformed Lp(a) values adjusted for age, sex and the predominantly expressed apo(a) isoform.

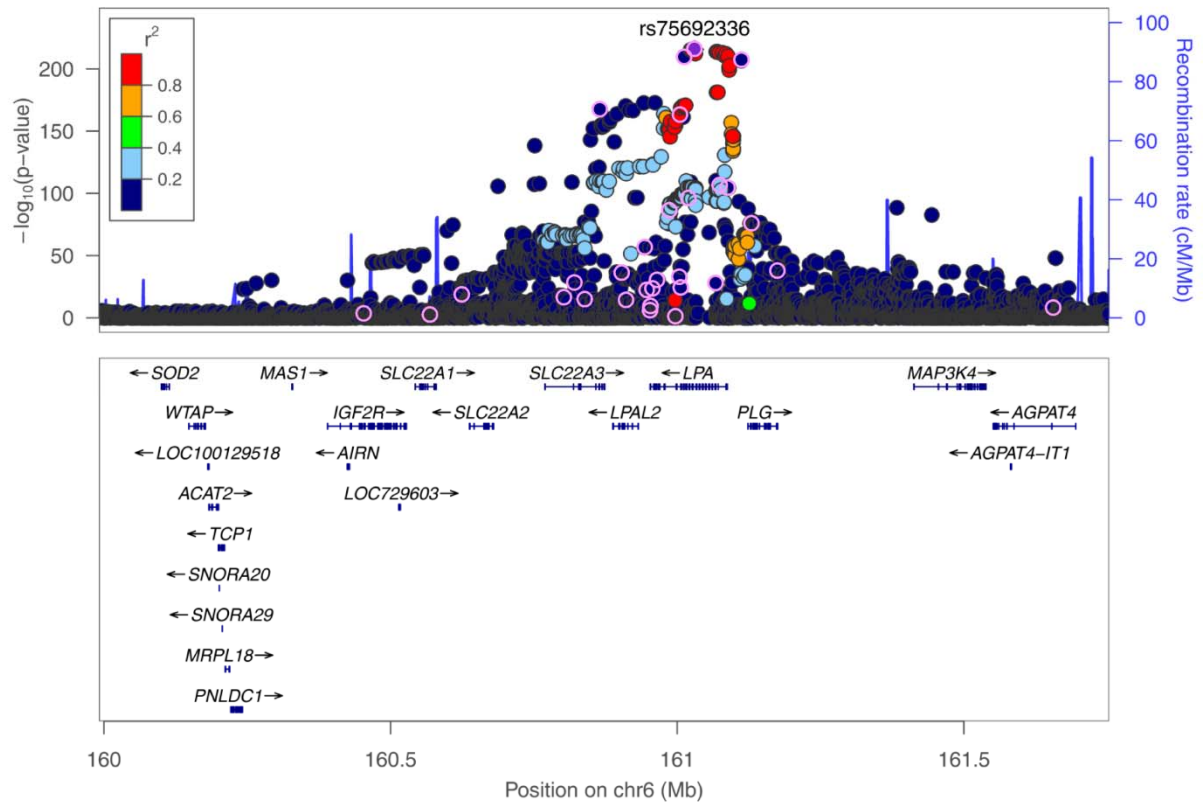

**Figure S6:** Regional plot showing the genomic region surrounding the *LPA* gene (chr6:159,991,850-161,753,083; LD refers to rs75692336, based on 1000G EUR); p-values are derived from the meta-analysis on the five cohorts on inverse-normal-transformed Lp(a) concentrations, adjusted for age, sex and the predominantly expressed apo(a) isoform. All SNPs, which are independently associated with Lp(a) in a joint model are circled.

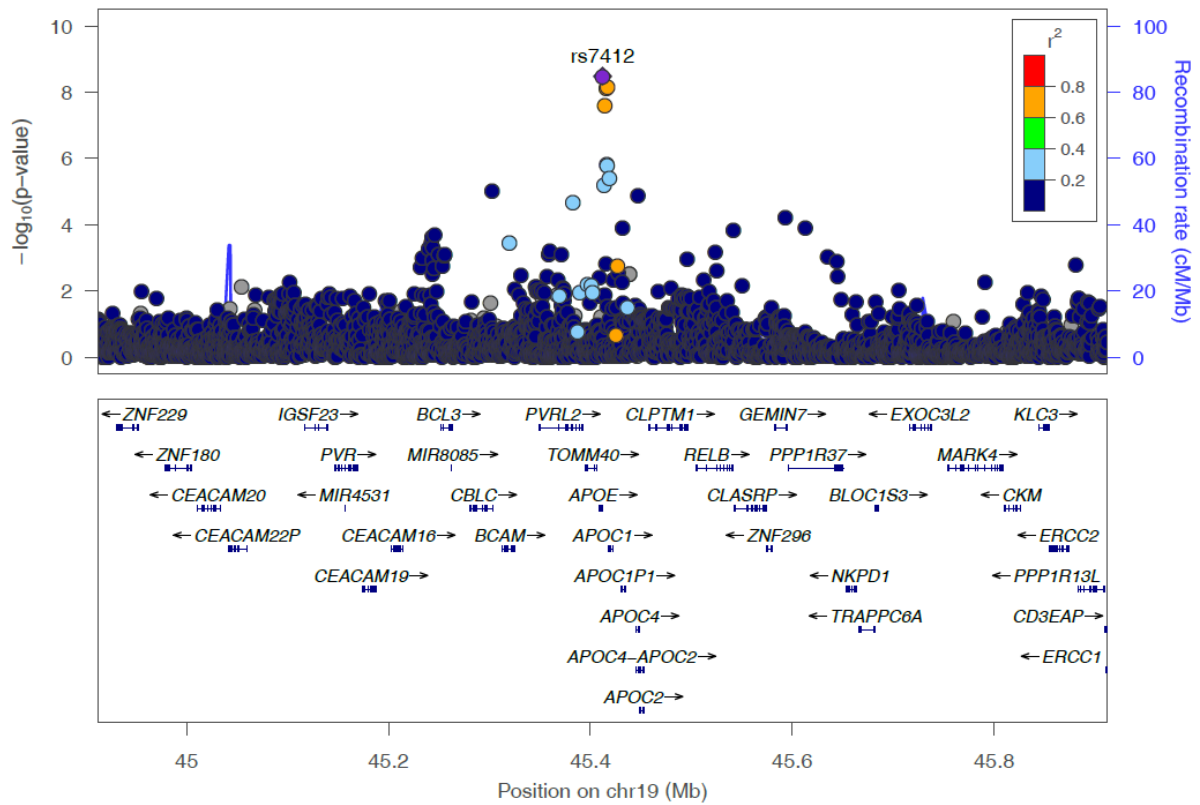

**Figure S7:** Regional plot showing the genomic region defined by the *APOE*-lead SNP rs7412 +/- 500 kB (LD refers to rs7412, based on 1000G EUR); p-values are derived from the meta-analysis on the five cohorts on inverse-normal-transformed Lp(a) concentrations, adjusted for age, sex and the predominantly expressed apo(a) isoform.

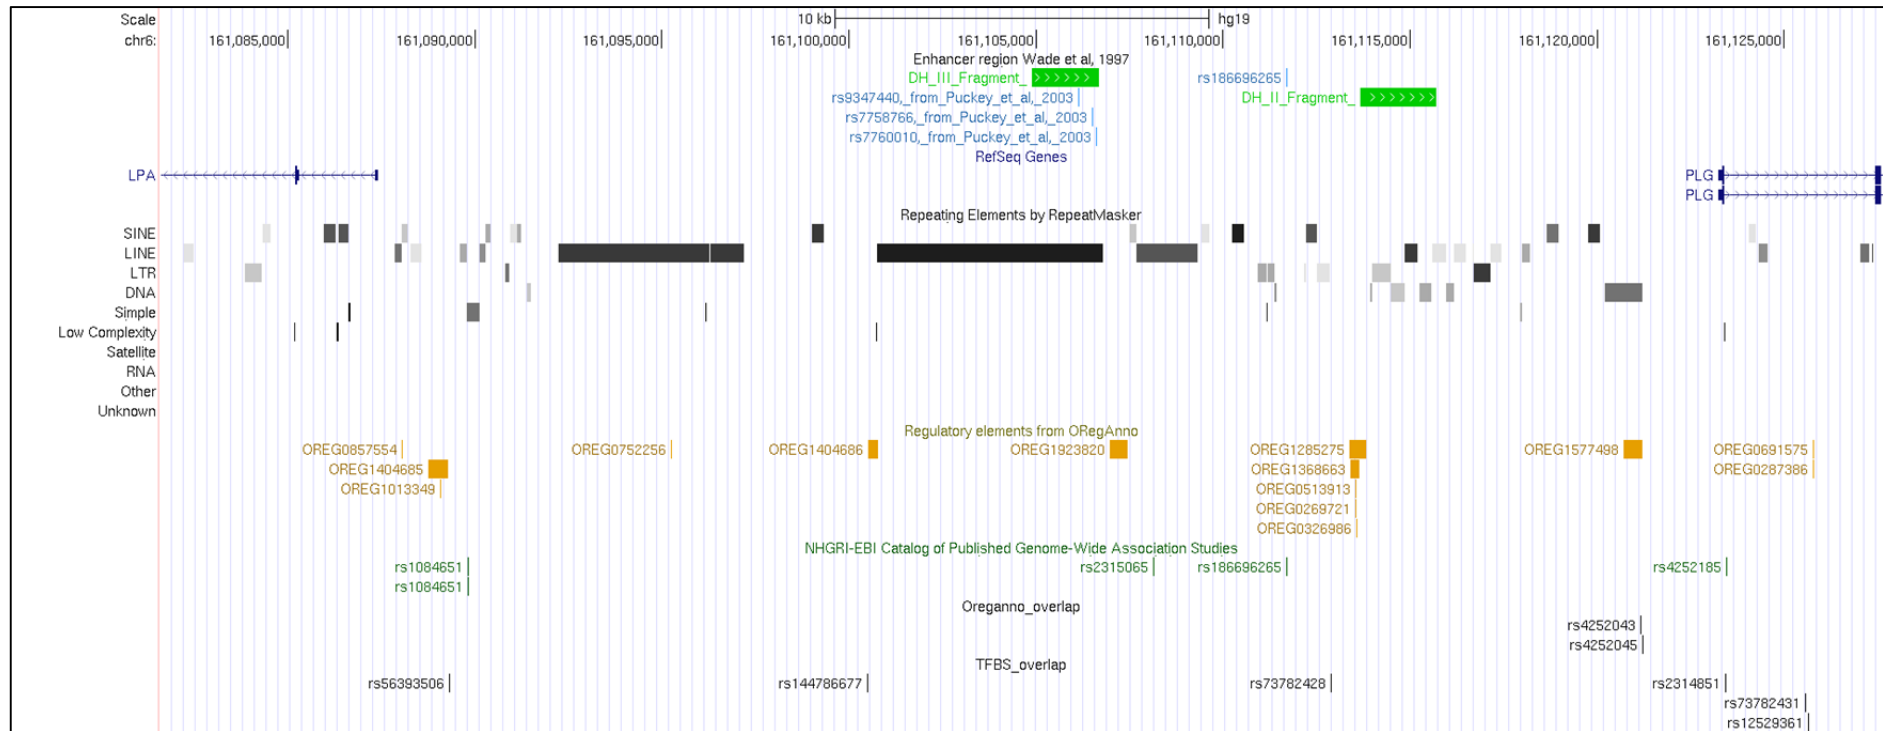

**Figure S8:** Intergenic region LPA-PLG with enhancer region described by Wade et al, 1997 (55).

This figure shows the intergenic region between *LPA* and *PLG*, superimposed to the UCSC Genome output for this region as described in Lamina et al, 2011 (56). The positions of the enhancer regions reported by Wade et al, 1997 is shown by green bars in the top row. SNPs are shown in blue. The second row shows the gene location, followed by repeat regions as predicted by Repeat Masker. The DHIII enhancer overlaps a LINE retrotransposon element, as determined by Wade et al, 1997 (55). The next rows show ORegAnno elements, GWAS hits in this region and the IDs of SNPs directly overlapping ORegAnno and transcription factor binding sites (TFBS) as reported Tables S4 and S9.

The three SNPs in the enhancer region reported by Puckey et al, 2003 (57) were associated with 2.5-fold increased reporter gene transcriptional activity, 0.6-fold reporter gene transcriptional activity, and 0.7-fold reporter gene transcriptional activity for rs9347440, rs7760010 and rs7758766, respectively. rs7760010 and rs7758766 were also present in our dataset (rs7760010:  $p=1.38 \times 10^{-4}$ ,  $\beta(sd)=0.47(0.122)$ , rs7758766:  $p=6.37 \times 10^{-9}$ ,  $\beta(sd)=0.26(0.026)$ ).

The figure also shows the location of the SNP rs186696265, that showed the strongest effect on Lp(a) in our study (see Supplementary Tables 5 and 6 and the Discussion section in the main document), between the two reported enhancers.

## Supplementary References

1. Firmann, M., V. Mayor, P. M. Vidal, M. Bochud, A. Pécoud, D. Hayoz, F. Paccaud, M. Preisig, K. S. Song, X. Yuan, T. M. Danoff, H. A. Stirnadel, D. Waterworth, V. Mooser, G. Waeber, and P. Vollenweider. 2008. The CoLaus study: a population-based study to investigate the epidemiology and genetic determinants of cardiovascular risk factors and metabolic syndrome. *BMC Cardiovasc. Disord.* **8**: 6.
2. Higgins, M., M. Province, G. Heiss, J. Eckfeldt, R. C. Ellison, A. R. Folsom, D. C. Rao, J. M. Sprafka, and R. Williams. 1996. NHLBI Family Heart Study: objectives and design. *Am. J. Epidemiol.* **143**: 1219–28.
3. Heid, I. M., E. Boes, M. Müller, B. Kollerits, C. Lamina, S. Coassin, C. Gieger, A. Döring, N. Klopp, R. Frikke-Schmidt, A. Tybjaerg-Hansen, A. Brandstätter, A. Luchner, T. Meitinger, H.-E. Wichmann, and F. Kronenberg. 2008. Genome-wide association analysis of high-density lipoprotein cholesterol in the population-based KORA study sheds new light on intergenic regions. *Circ. Cardiovasc. Genet.* **1**: 10–20.
4. Juonala, M., J. S. A. Viikari, and O. T. Raitakari. 2013. Main findings from the prospective Cardiovascular Risk in Young Finns Study. *Curr. Opin. Lipidol.* **24**: 57–64.
5. Jylhävä, J., L.-P. Lyytikäinen, M. Kähönen, N. Hutri-Kähönen, J. Kettunen, J. Viikari, O. T. Raitakari, T. Lehtimäki, and M. Hurme. 2012. A genome-wide association study identifies UGT1A1 as a regulator of serum cell-free DNA in young adults: The Cardiovascular Risk in Young Finns Study. *PLoS One.* **7**: e35426.
6. Heid, I. M., S. A. Wagner, H. Gohlke, B. Iglseder, J. C. Mueller, P. Cip, G. Ladurner, R. Reiter, A. Stadlmayr, V. Mackevics, T. Illig, F. Kronenberg, and B. Paulweber. 2006. Genetic architecture of the APM1 gene and its influence on adiponectin plasma levels and parameters of the metabolic syndrome in 1,727 healthy Caucasians. *Diabetes.* **55**: 375–84.
7. Kronenberg, F., E. M. Lobentanz, P. König, G. Utermann, and H. Dieplinger. 1994. Effect of sample storage on the measurement of lipoprotein[a], apolipoproteins B and A-IV, total and high density lipoprotein cholesterol and triglycerides. *J. Lipid Res.* **35**: 1318–28.
8. Kronenberg, F., E. Kuen, E. Ritz, R. Junker, P. König, G. Kraatz, K. Lhotta, J. F. Mann, G. A. Müller, U. Neyer, W. Riegel, P. Reigler, V. Schwenger, and A. Von Eckardstein. 2000. Lipoprotein(a) serum concentrations and apolipoprotein(a) phenotypes in mild and moderate renal failure. *J. Am. Soc. Nephrol.* **11**: 105–15.
9. Winkler, T. W., F. R. Day, D. C. Croteau-Chonka, A. R. Wood, A. E. Locke, R. Mägi, T. Ferreira, T. Fall, M. Graff, A. E. Justice, J. Luan, S. Gustafsson, J. C. Randall, S. Vedantam, T. Workalemahu, T. O. Kilpeläinen, A. Scherag, T. Esko, Z. Kutalik, I. M. Heid, R. J. F. Loos, and Genetic Investigation of Anthropometric Traits (GIANT) Consortium. 2014. Quality control and conduct of genome-wide association meta-analyses. *Nat. Protoc.* **9**: 1192–212.
10. Han, B., and E. Eskin. 2011. Random-effects model aimed at discovering associations in meta-analysis of genome-wide association studies. *Am. J. Hum. Genet.* **88**: 586–98.
11. Romagnuolo, R., C. A. Scipione, M. B. Boffa, S. M. Marcovina, N. G. Seidah, and M. L. Koschinsky. 2015. Lipoprotein(a) catabolism is regulated by proprotein convertase subtilisin/kexin type 9 through the low density lipoprotein receptor. *J. Biol. Chem.* **290**: 11649–62.
12. Scipione, C. A., S. E. Sayegh, R. Romagnuolo, S. Tsimikas, S. M. Marcovina, M. B. Boffa, and M. L. Koschinsky. 2015. Mechanistic insights into Lp(a)-induced IL-8 expression: a role for oxidized

- phospholipid modification of apo(a). *J. Lipid Res.* **56**: 2273–85.
13. Tsimikas, S., and J. L. Hall. 2012. Lipoprotein(a) as a potential causal genetic risk factor of cardiovascular disease: a rationale for increased efforts to understand its pathophysiology and develop targeted therapies. *J. Am. Coll. Cardiol.* **60**: 716–21.
  14. Kalaivani, V., and P. S. Appukuttan. 2014. Circulating Lp(a):LDL complexes contain LDL molecules proportionate to Lp(a) size and bind to galectin-1: a possible route for LDL entry into cells. *Lipids.* **49**: 1101–13.
  15. März, W., A. Beckmann, H. Scharnagl, R. Siekmeier, U. Mondorf, I. Held, W. Schneider, K. T. Preissner, L. K. Curtiss, and W. Gross. 1993. Heterogeneous lipoprotein (a) size isoforms differ by their interaction with the low density lipoprotein receptor and the low density lipoprotein receptor-related protein/alpha 2-macroglobulin receptor. *FEBS Lett.* **325**: 271–5.
  16. Niemeier, A., T. Willnow, H. Dieplinger, C. Jacobsen, N. Meyer, J. Hilpert, and U. Beisiegel. 1999. Identification of megalin/gp330 as a receptor for lipoprotein(a) in vitro. *Arterioscler. Thromb. Vasc. Biol.* **19**: 552–61.
  17. Arnold, M., J. Raffler, A. Pfeufer, K. Suhre, and G. Kastenmüller. 2015. SNIIPA: an interactive, genetic variant-centered annotation browser. *Bioinformatics.* **31**: 1334–6.
  18. Yang, X.-P., M. J. Amar, B. Vaisman, A. V Bocharov, T. G. Vishnyakova, L. a Freeman, R. J. Kurlander, A. P. Patterson, L. C. Becker, and A. T. Remaley. 2013. Scavenger receptor-BI is a receptor for lipoprotein(a). *J. Lipid Res.* **54**: 2450–7.
  19. Argraves, K. M., K. F. Kozarsky, J. T. Fallon, P. C. Harpel, and D. K. Strickland. 1997. The atherogenic lipoprotein Lp(a) is internalized and degraded in a process mediated by the VLDL receptor. *J. Clin. Invest.* **100**: 2170–81.
  20. Kapetanopoulos, A., F. Fresser, G. Millonig, Y. Shaul, G. Baier, and G. Utermann. 2002. Direct interaction of the extracellular matrix protein DANCE with apolipoprotein(a) mediated by the kringle IV-type 2 domain. *Mol. Genet. Genomics.* **267**: 440–6.
  21. Berthold, H. K., M. Laudes, W. Krone, and I. Gouni-Berthold. 2011. Association between the interleukin-6 promoter polymorphism -174G/C and serum lipoprotein(a) concentrations in humans. *PLoS One.* **6**: e24719.
  22. Chennamsetty, I., T. Claudel, K. M. Kostner, A. Baghdasaryan, D. Kratky, S. Levak-Frank, S. Frank, F. J. Gonzalez, M. Trauner, and G. M. Kostner. 2011. Farnesoid X receptor represses hepatic human APOA gene expression. *J. Clin. Invest.* **121**: 3724–34.
  23. Chennamsetty, I., T. Claudel, K. M. Kostner, M. Trauner, and G. M. Kostner. 2012. FGF19 signaling cascade suppresses APOA gene expression. *Arterioscler. Thromb. Vasc. Biol.* **32**: 1220–7.
  24. Seimon, T. A., M. J. Nadolski, X. Liao, J. Magallon, M. Nguyen, N. T. Feric, M. L. Koschinsky, R. Harkewicz, J. L. Witztum, S. Tsimikas, D. Golenbock, K. J. Moore, and I. Tabas. 2010. Atherogenic lipids and lipoproteins trigger CD36-TLR2-dependent apoptosis in macrophages undergoing endoplasmic reticulum stress. *Cell Metab.* **12**: 467–82.
  25. Hoover-Plow, J., and M. Huang. 2013. Lipoprotein(a) metabolism: potential sites for therapeutic targets. *Metabolism.* **62**: 479–91.
  26. Toth, P. P. 2016. PCSK9 and Lipoprotein(a): The Plot Thickens. *Circ. Res.* **119**: 3–6.



27. Seidah, N. G., Z. Awan, M. Chrétien, and M. Mbikay. 2014. PCSK9: a key modulator of cardiovascular health. *Circ. Res.* **114**: 1022–36.
28. Karolchik, D., A. S. Hinrichs, T. S. Furey, K. M. Roskin, C. W. Sugnet, D. Haussler, and W. J. Kent. 2004. The UCSC Table Browser data retrieval tool. *Nucleic Acids Res.* **32**: D493-6.
29. Yates, A., W. Akanni, M. R. Amode, D. Barrell, K. Billis, D. Carvalho-Silva, C. Cummins, P. Clapham, S. Fitzgerald, L. Gil, C. G. Girón, L. Gordon, T. Hourlier, S. E. Hunt, S. H. Janacek, N. Johnson, T. Juettemann, S. Keenan, I. Lavidas, F. J. Martin, T. Maurel, W. McLaren, D. N. Murphy, R. Nag, M. Nuhn, A. Parker, M. Patricio, M. Pignatelli, M. Rahtz, H. S. Riat, D. Sheppard, K. Taylor, A. Thormann, A. Vullo, S. P. Wilder, A. Zadissa, E. Birney, J. Harrow, M. Muffato, E. Perry, M. Ruffier, G. Spudich, S. J. Trevanion, F. Cunningham, B. L. Aken, D. R. Zerbino, and P. Flicek. 2016. Ensembl 2016. *Nucleic Acids Res.* **44**: D710-6.
30. Birney, E., J. A. Stamatoyannopoulos, A. Dutta, R. G. Oacute, T. R. Gingeras, E. H. Margulies, Z. Weng, M. Snyder, E. T. Dermitzakis, R. E. Thurman, M. S. Kuehn, C. M. Taylor, S. Neph, C. M. Koch, S. Asthana, A. Malhotra, I. Adzhubei, J. A. Greenbaum, R. M. Andrews, P. Flicek, P. J. Boyle, H. Cao, N. P. Carter, G. K. Clelland, S. Davis, N. Day, P. Dhami, S. C. Dillon, M. O. Dorschner, H. Fiegler, P. G. Giresi, J. Goldy, M. Hawrylycz, A. Haydock, R. Humbert, K. D. James, B. E. Johnson, E. M. Johnson, T. T. Frum, E. R. Rosenzweig, N. Karnani, K. Lee, G. C. Lefebvre, P. A. Navas, F. Neri, S. C. J. Parker, P. J. Sabo, R. Sandstrom, A. Shafer, D. Vetrie, et al. 2007. Identification and analysis of functional elements in 1% of the human genome by the ENCODE pilot project. *Nature.* **447**: 799–816.
31. Lesurf, R., K. C. Cotto, G. Wang, M. Griffith, K. Kasaian, S. J. M. Jones, S. B. Montgomery, O. L. Griffith, and Open Regulatory Annotation Consortium. 2016. ORegAnno 3.0: a community-driven resource for curated regulatory annotation. *Nucleic Acids Res.* **44**: D126-32.
32. GTEx Consortium. 2015. Human genomics. The Genotype-Tissue Expression (GTEx) pilot analysis: multitissue gene regulation in humans. *Science.* **348**: 648–60.
33. Zannis, V. I., J. L. Breslow, G. Utermann, R. W. Mahley, K. H. Weisgraber, R. J. Havel, J. L. Goldstein, M. S. Brown, G. Schonfeld, W. R. Hazzard, and C. Blum. 1982. Proposed nomenclature of apoE isoproteins, apoE genotypes, and phenotypes. *J. Lipid Res.* **23**: 911–4.
34. Utermann, G., U. Langenbeck, U. Beisiegel, and W. Weber. 1980. Genetics of the apolipoprotein E system in man. *Am. J. Hum. Genet.* **32**: 339–47.
35. Gerstein, M. B., A. Kundaje, M. Hariharan, S. G. Landt, K.-K. Yan, C. Cheng, X. J. Mu, E. Khurana, J. Rozowsky, R. Alexander, R. Min, P. Alves, A. Abyzov, N. Addleman, N. Bhardwaj, A. P. Boyle, P. Cayting, A. Charos, D. Z. Chen, Y. Cheng, D. Clarke, C. Eastman, G. Euskirchen, S. Fietze, Y. Fu, J. Gertz, F. Grubert, A. Harmanci, P. Jain, M. Kasowski, P. Lacroute, J. Leng, J. Lian, H. Monahan, H. O’Geen, Z. Ouyang, E. C. Partridge, D. Patacsil, F. Pauli, D. Raha, L. Ramirez, T. E. Reddy, B. Reed, M. Shi, T. Slifer, J. Wang, L. Wu, X. Yang, K. Y. Yip, G. Zilberman-Schapiro, et al. 2012. Architecture of the human regulatory network derived from ENCODE data. *Nature.* **489**: 91–100.
36. Wang, J., J. Zhuang, S. Iyer, X. Lin, T. W. Whitfield, M. C. Greven, B. G. Pierce, X. Dong, A. Kundaje, Y. Cheng, O. J. Rando, E. Birney, R. M. Myers, W. S. Noble, M. Snyder, and Z. Weng. 2012. Sequence features and chromatin structure around the genomic regions bound by 119 human transcription factors. *Genome Res.* **22**: 1798–812.
37. Wang, J., J. Zhuang, S. Iyer, X.-Y. Lin, M. C. Greven, B.-H. Kim, J. Moore, B. G. Pierce, X. Dong, D. Virgil, E. Birney, J.-H. Hung, and Z. Weng. 2013. Factorbook.org: a Wiki-based database for

- transcription factor-binding data generated by the ENCODE consortium. *Nucleic Acids Res.* **41**: D171-6.
38. Ogorelkova, M., H. G. Kraft, C. Ehnholm, and G. Utermann. 2001. Single nucleotide polymorphisms in exons of the apo(a) kringle IV types 6 to 10 domain affect Lp(a) plasma concentrations and have different patterns in Africans and Caucasians. *Hum. Mol. Genet.* **10**: 815–24.
  39. Prins, J., F. R. Leus, B. N. Bouma, and H. J. van Rijn. 1999. The identification of polymorphisms in the coding region of the apolipoprotein (a) gene—association with earlier identified polymorphic sites and influence on the lipoprotein (a) concentration. *Thromb. Haemost.* **82**: 1709–17.
  40. Chennamsetty, I., K. M. Kostner, T. Claudel, M. Vinod, S. Frank, T. S. Weiss, M. Trauner, and G. M. Kostner. 2012. Nicotinic acid inhibits hepatic APOA gene expression: studies in humans and in transgenic mice. *J. Lipid Res.* **53**: 2405–12.
  41. de Knijff, P., A. Kaptein, D. Boomsma, H. M. Princen, R. R. Frants, and L. M. Havekes. 1991. Apolipoprotein E polymorphism affects plasma levels of lipoprotein(a). *Atherosclerosis.* **90**: 169–74.
  42. Muls, E., K. Kempen, G. Vansant, C. Cobbaert, and W. Saris. 1993. The effects of weight loss and apolipoprotein E polymorphism on serum lipids, apolipoproteins A-I and B, and lipoprotein(a). *Int. J. Obes. Relat. Metab. Disord.* **17**: 711–6.
  43. Horita, K., M. Eto, M. Saito, H. Nakata, Y. Iwashima, H. Ito, M. Takahashi, A. Kondo, A. Morikawa, and I. Makino. 1993. Effects of apolipoprotein E polymorphism on plasma lipoprotein(a) levels. *Artery.* **20**: 324–36.
  44. Schaefer, E. J., S. Lamon-Fava, S. Johnson, J. M. Ordovas, M. M. Schaefer, W. P. Castelli, and P. W. Wilson. 1994. Effects of gender and menopausal status on the association of apolipoprotein E phenotype with plasma lipoprotein levels. Results from the Framingham Offspring Study. *Arterioscler. Thromb. a J. Vasc. Biol.* **14**: 1105–13.
  45. Tiret, L., P. de Knijff, H. J. Menzel, C. Ehnholm, V. Nicaud, and L. M. Havekes. 1994. ApoE polymorphism and predisposition to coronary heart disease in youths of different European populations. The EARS Study. European Atherosclerosis Research Study. *Arterioscler. Thromb. a J. Vasc. Biol.* **14**: 1617–24.
  46. Lindahl, G., F. Mailly, S. Humphries, and M. Seed. 1994. Apolipoprotein E phenotype and lipoprotein(a) in familial hypercholesterolaemia: implication for lipoprotein(a) metabolism. *Clin. Investig.* **72**: 631–8.
  47. Heng, C. K., N. Saha, and J. S. Tay. 1995. Lack of association of apolipoprotein E polymorphism with plasma Lp(a) levels in the Chinese. *Clin. Genet.* **48**: 113–9.
  48. Muros, M., and C. Rodríguez-Ferrer. 1996. Apolipoprotein E polymorphism influence on lipids, apolipoproteins and Lp(a) in a Spanish population underexpressing apo E4. *Atherosclerosis.* **121**: 13–21.
  49. Klausen, I. C., L. U. Gerdes, P. S. Hansen, L. Lemming, C. Gerdes, and O. Faergeman. 1996. Effects of apoE gene polymorphism on Lp(a) concentrations depend on the size of apo(a): a study of 466 white men. *J. Mol. Med. (Berl).* **74**: 685–90.
  50. Boomsma, D. I., P. Knijff, A. Kaptein, C. Labeur, N. G. Martin, L. M. Havekes, and H. M. Princen. 2000. The effect of apolipoprotein(a)-, apolipoprotein E-, and apolipoprotein A4-

- polymorphisms on quantitative lipoprotein(a) concentrations. *Twin Res.* **3**: 152–8.
51. Frikke-Schmidt, R., B. G. Nordestgaard, B. Agerholm-Larsen, P. Schnohr, and A. Tybjaerg-Hansen. 2000. Context-dependent and invariant associations between lipids, lipoproteins, and apolipoproteins and apolipoprotein E genotype. *J. Lipid Res.* **41**: 1812–22.
  52. Anuurad, E., G. Lu, J. Rubin, T. A. Pearson, and L. Berglund. 2007. ApoE genotype affects allele-specific apo[a] levels for large apo[a] sizes in African Americans: the Harlem-Basset Study. *J. Lipid Res.* **48**: 693–8.
  53. Li, J., L. A. Lange, J. Sabourin, Q. Duan, W. Valdar, M. S. Willis, Y. Li, J. G. Wilson, and E. M. Lange. 2015. Genome- and exome-wide association study of serum lipoprotein (a) in the Jackson Heart Study. *J. Hum. Genet.* **60**: 755–61.
  54. Moriarty, P. M., S. A. Varvel, P. L. S. M. Gordts, J. P. McConnell, and S. Tsimikas. 2017. Lipoprotein(a) Mass Levels Increase Significantly According to APOE Genotype: An Analysis of 431 239 Patients. *Arterioscler. Thromb. Vasc. Biol.* **37**: 580–588.
  55. Wade, D. P., L. H. Puckey, B. L. Knight, F. Acquati, A. Mihalich, and R. Taramelli. 1997. Characterization of multiple enhancer regions upstream of the apolipoprotein(a) gene. *J. Biol. Chem.* **272**: 30387–99.
  56. Lamina, C., S. Coassin, T. Illig, and F. Kronenberg. 2011. Look beyond one's own nose: combination of information from publicly available sources reveals an association of GATA4 polymorphisms with plasma triglycerides. *Atherosclerosis.* **219**: 698–703.
  57. Puckey, L. H., and B. L. Knight. 2003. Sequence and functional changes in a putative enhancer region upstream of the apolipoprotein(a) gene. *Atherosclerosis.* **166**: 119–27.
